# Supplementary material for: mTORC1-induced retinal progenitor cell overproliferation leads to accelerated mitotic aging and degeneration of descendent Müller glia
Source: eLife journal article supplement (doi:10.7554/elife.70079), 2021-10-22

Fig.1 – fig. suppl. 2B

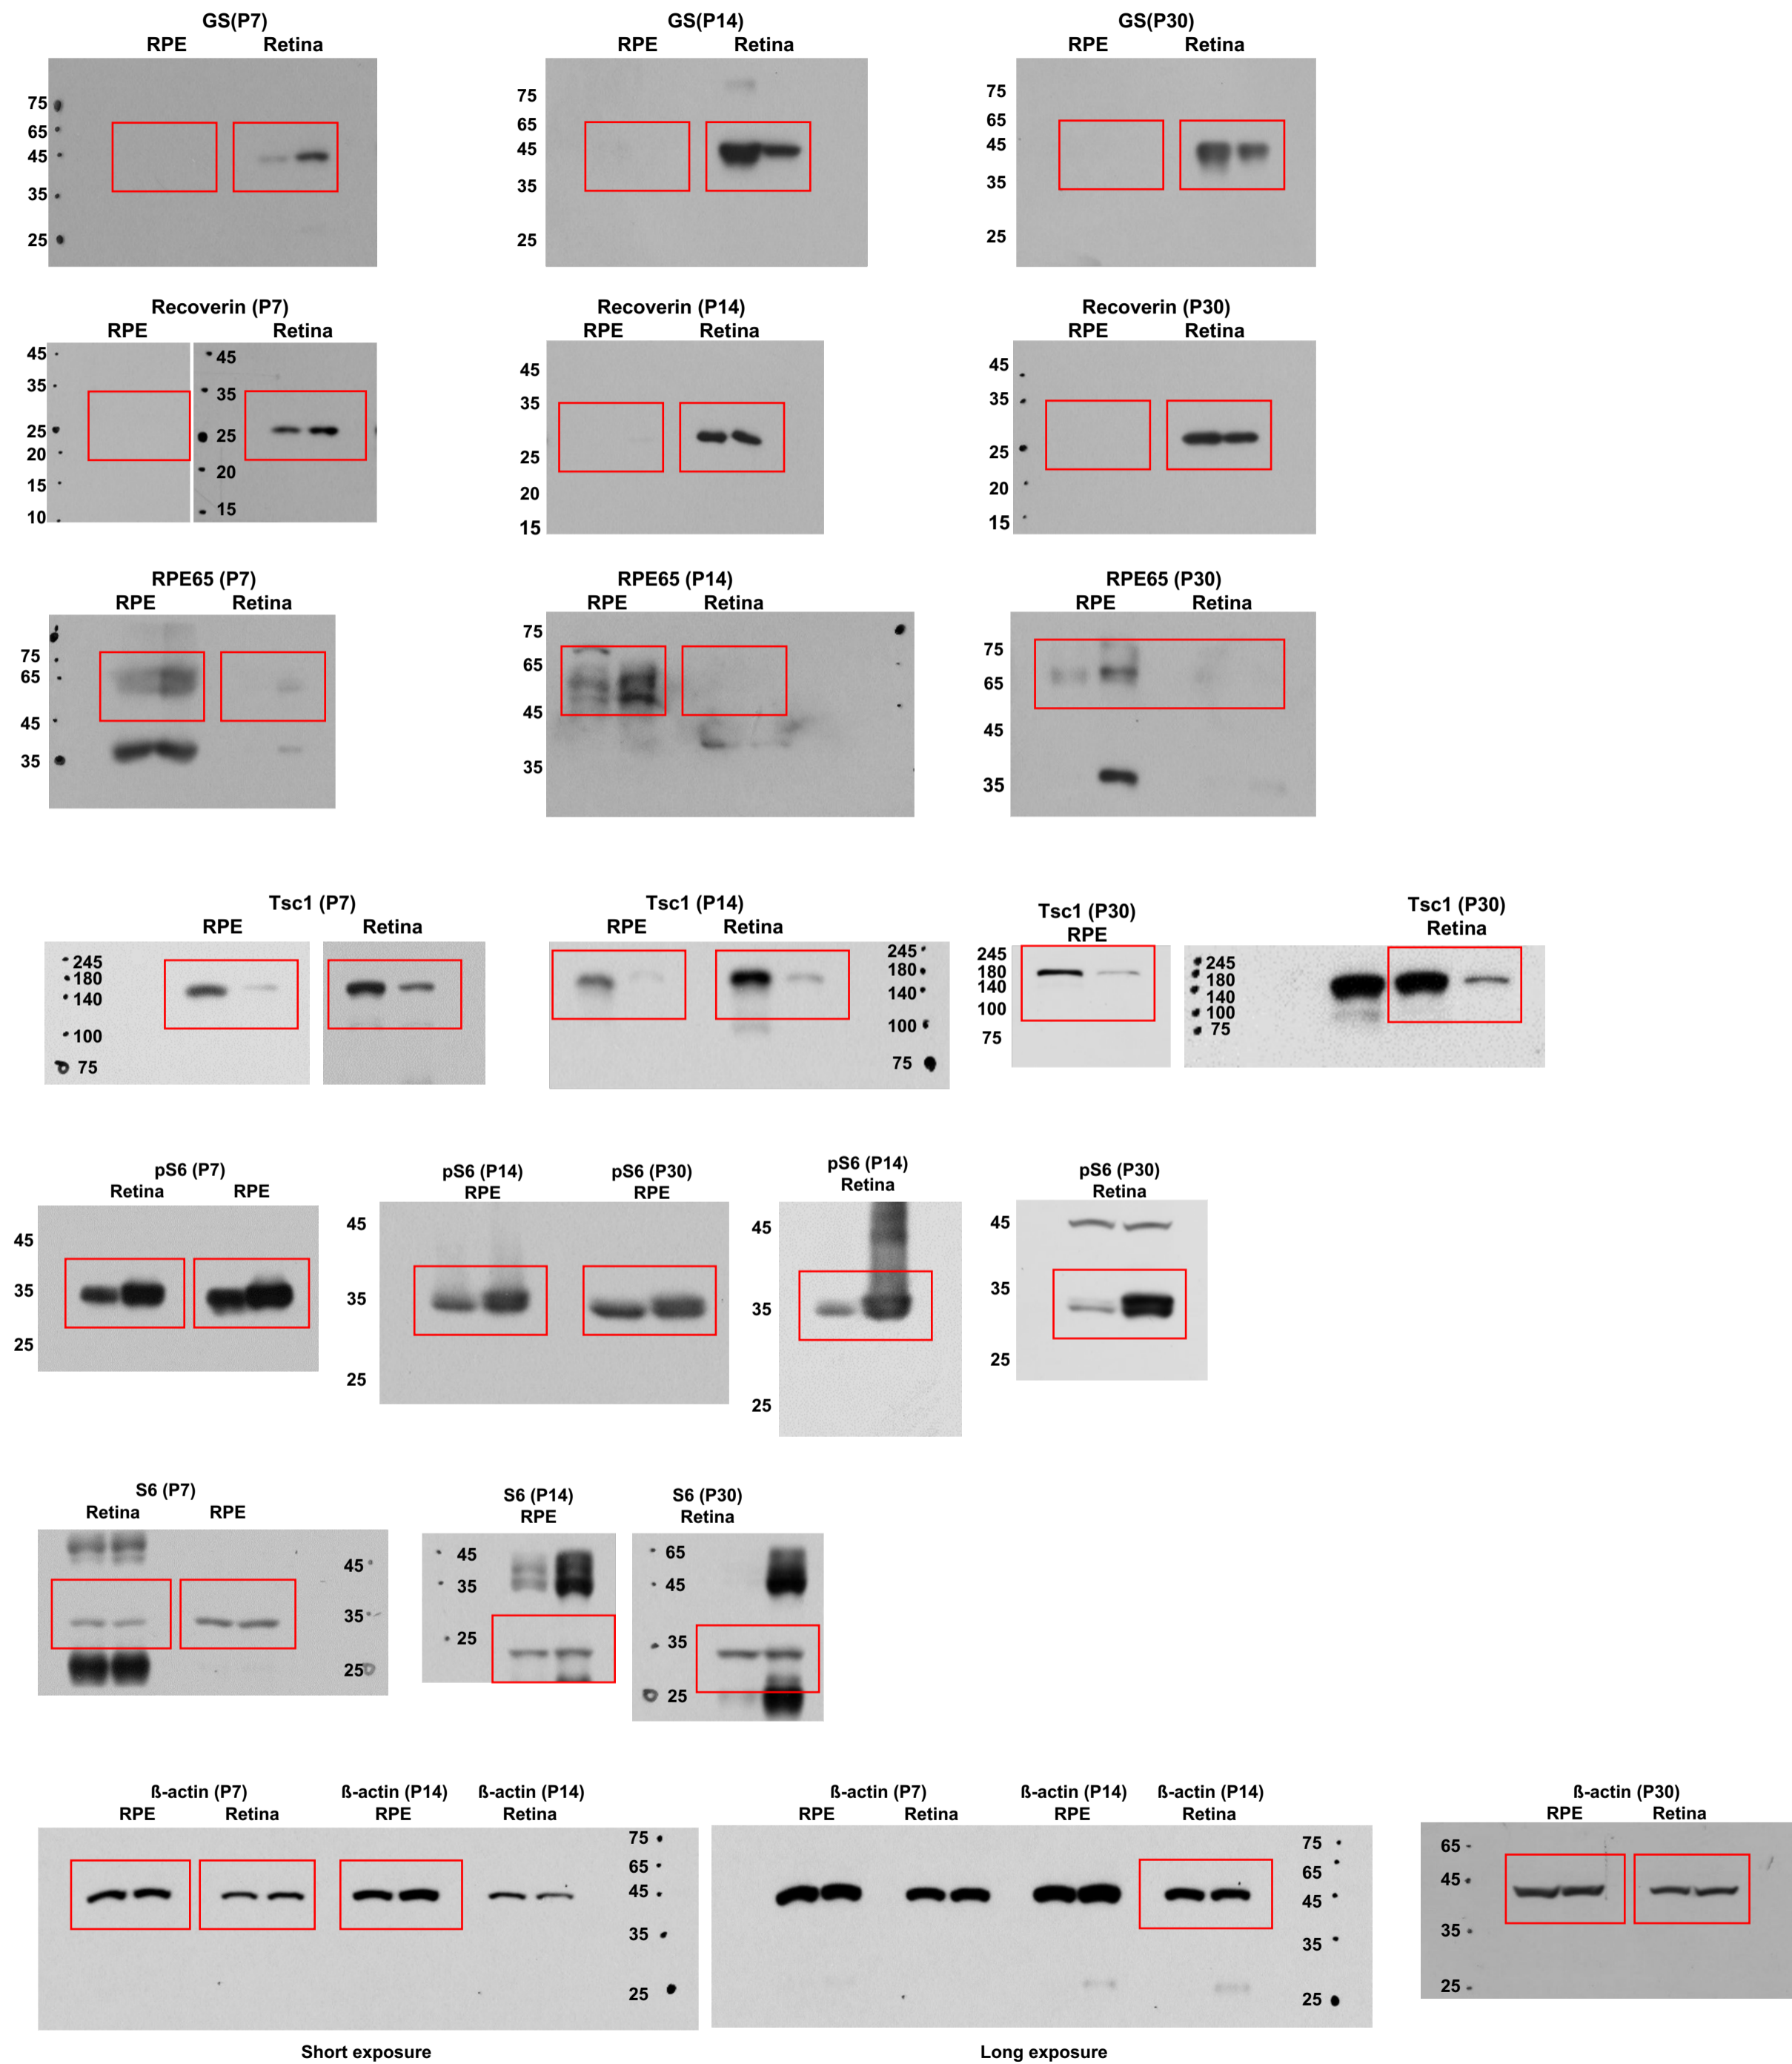

Fig.1 – fig. suppl. 4D

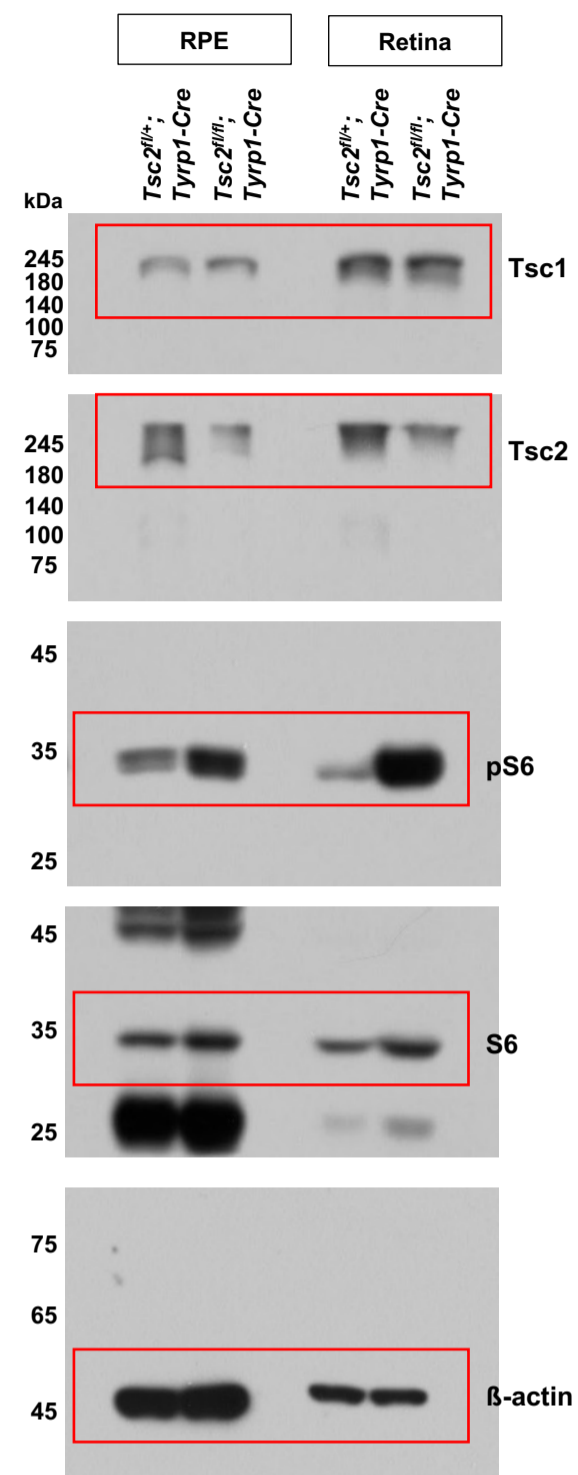

Fig.5 – fig. suppl. 3A

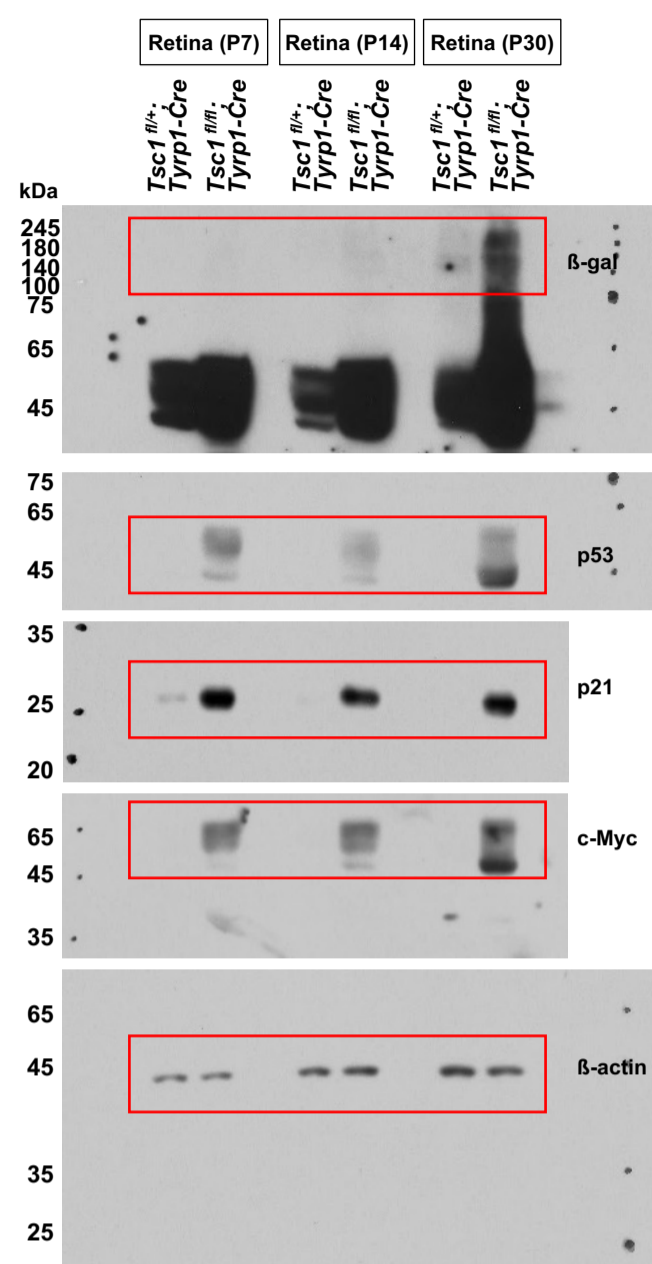

Fig.5 – fig. suppl. 3B

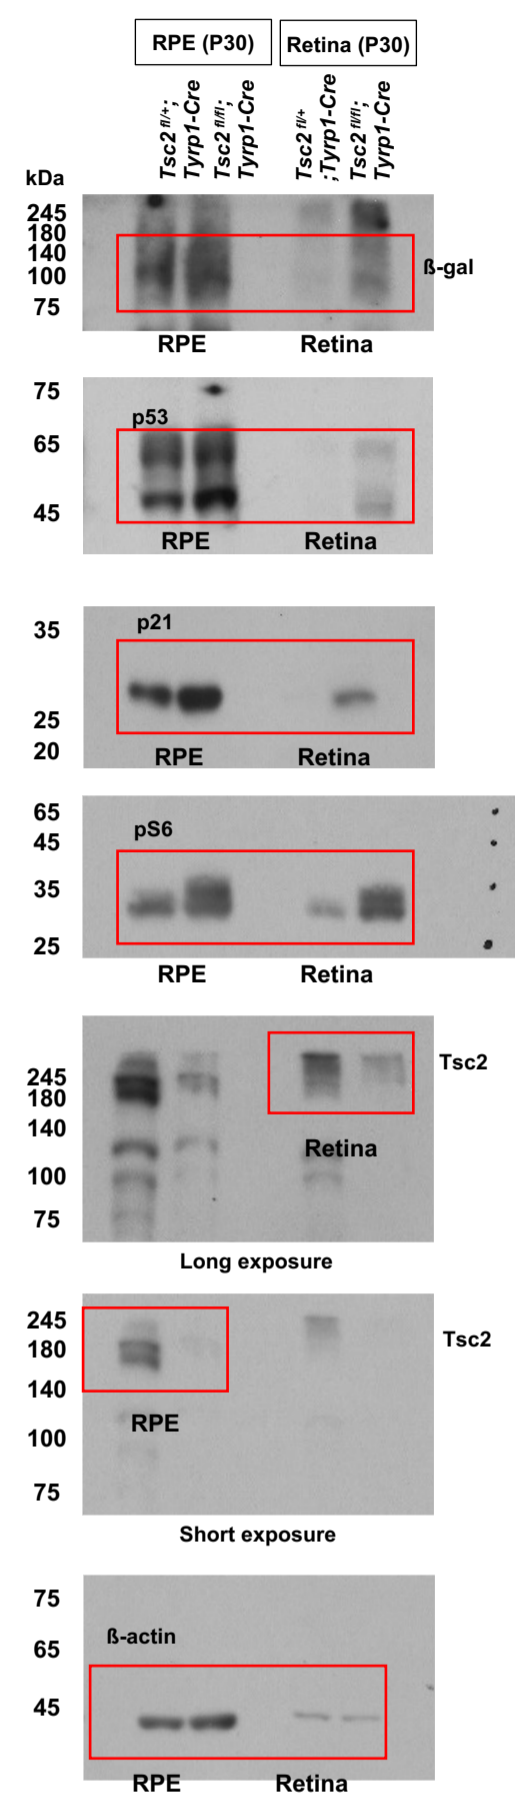

Fig.6 – fig. suppl. 2B

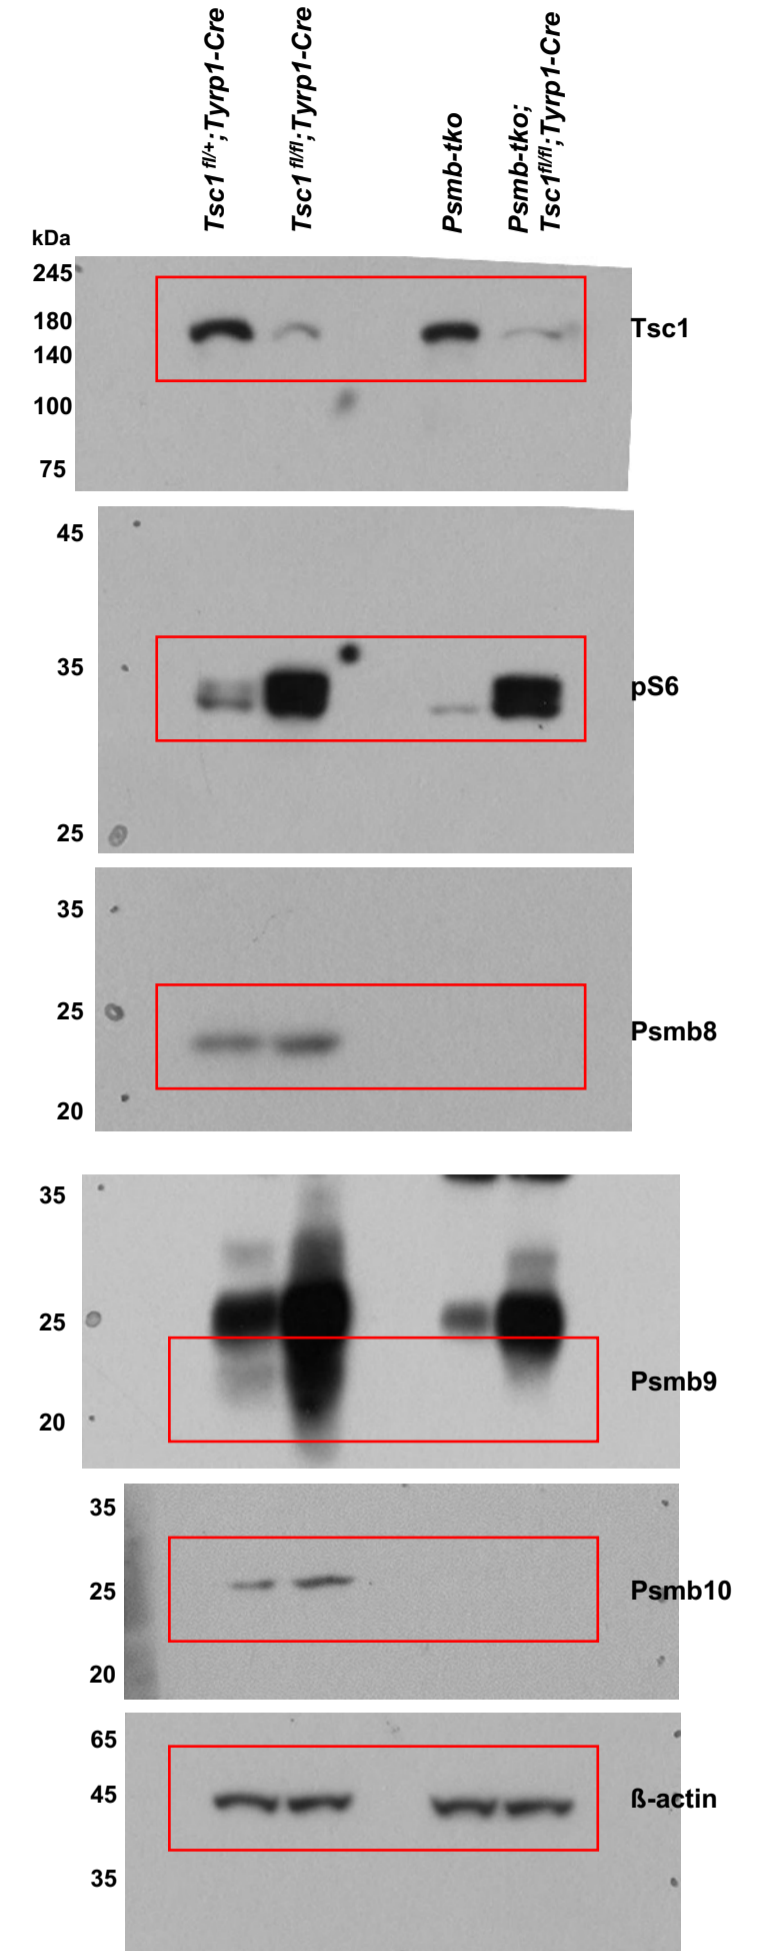

Supplement: supp [file elife-70079-supp-v1.zip]
