# Supplementary material for: mTORC1-induced retinal progenitor cell overproliferation leads to accelerated mitotic aging and degeneration of descendent Müller glia
Source: eLife journal article supplement (doi:10.7554/elife.70079), 2021-10-22
Supplement: supp [file elife-70079-supp-v1.zip]

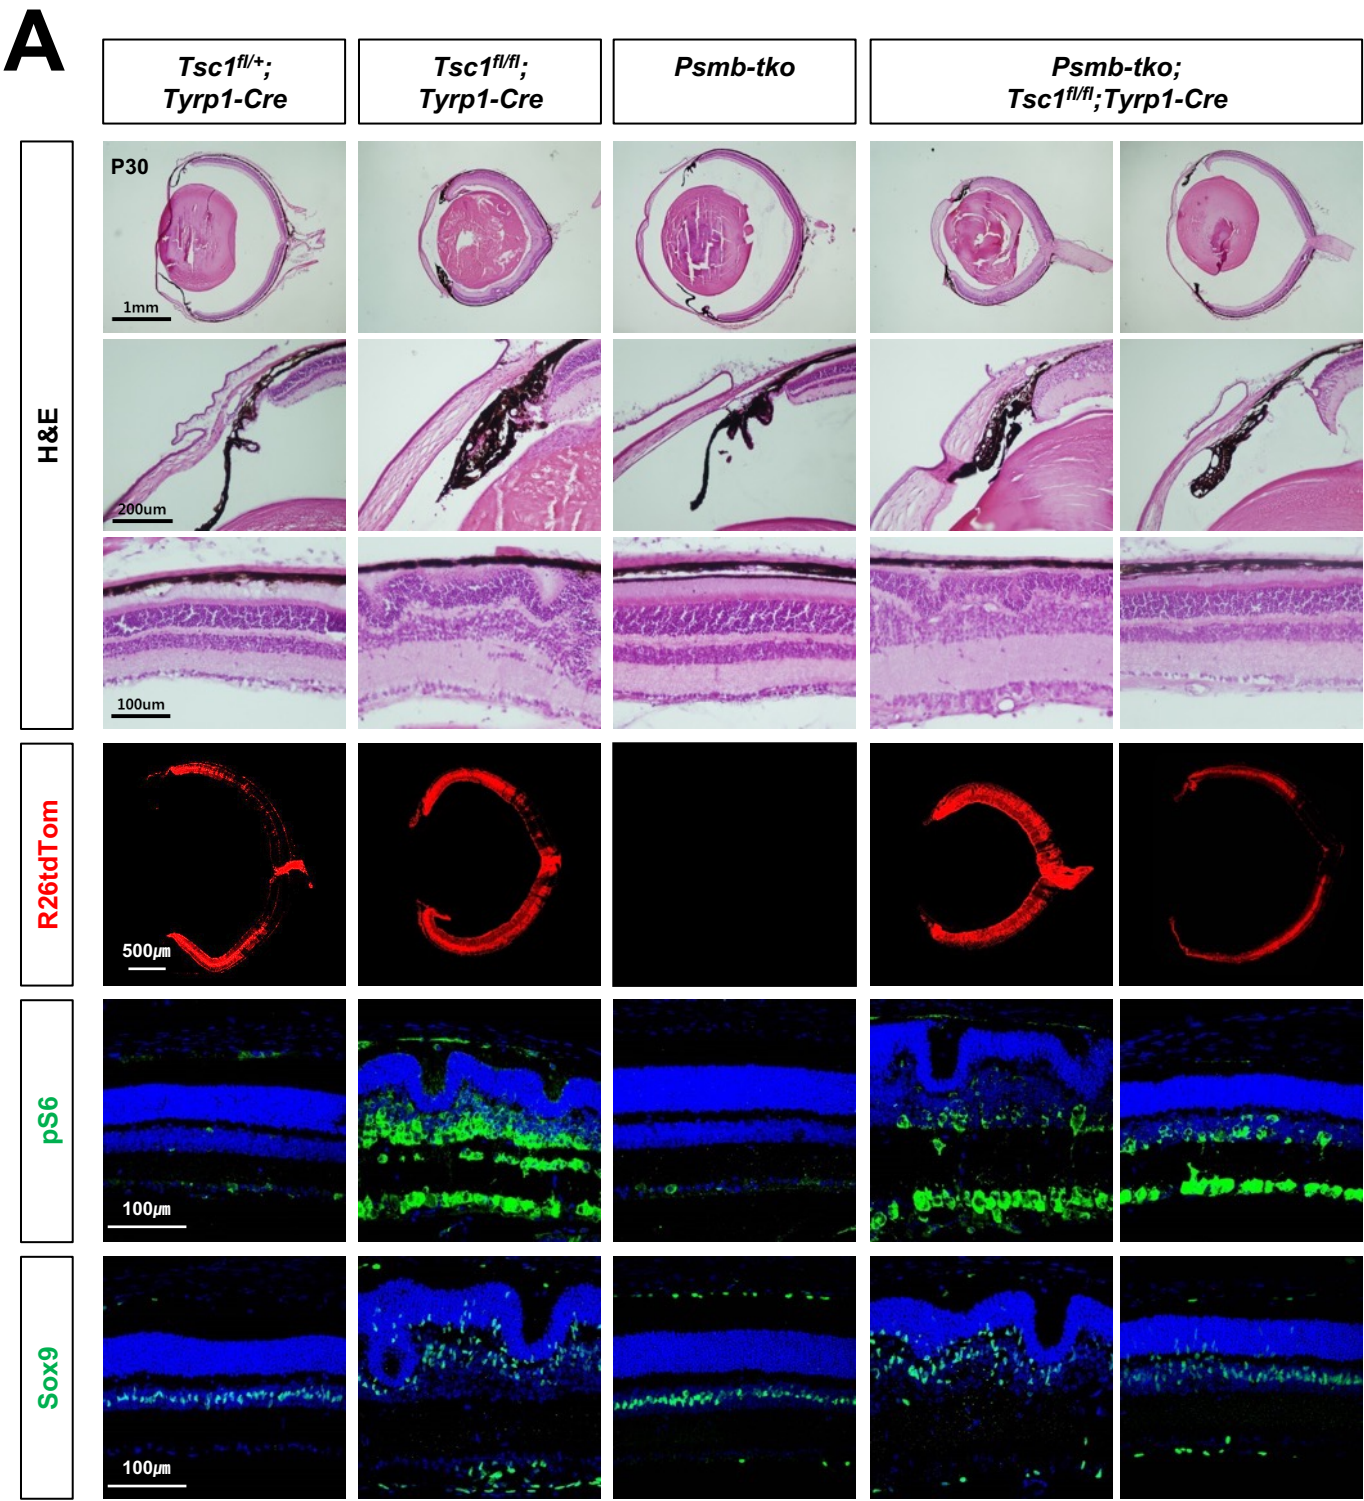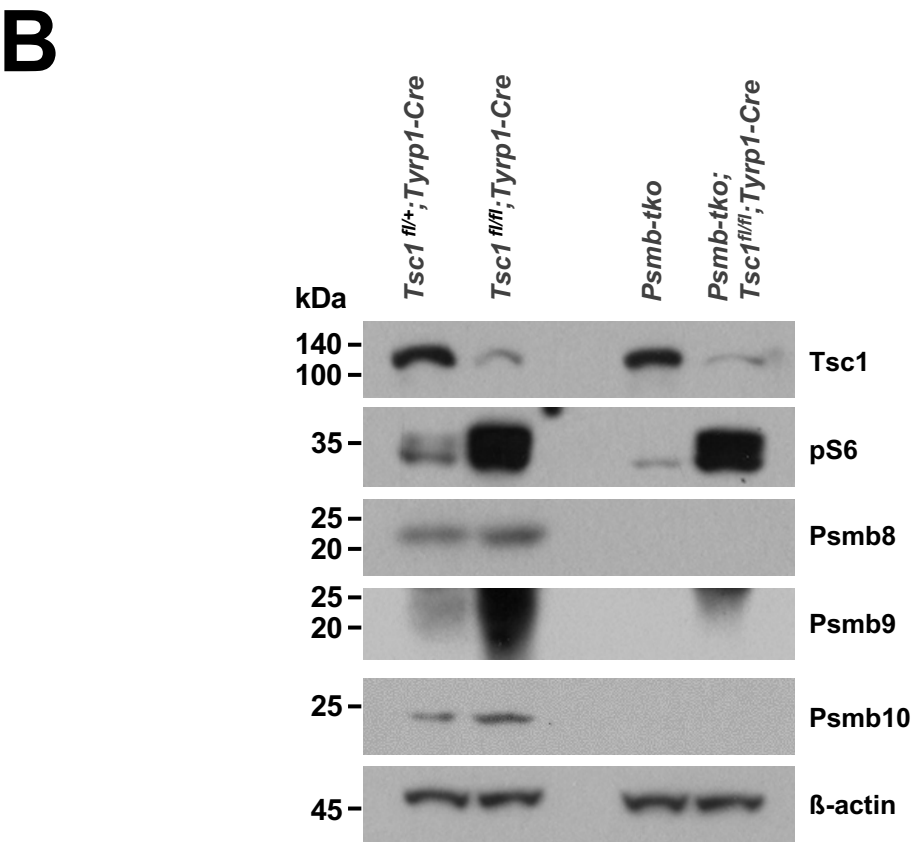

**C**

| Genotype \ Phenotype | Genotype                                  |                                            |                 |                                                          |
|----------------------|-------------------------------------------|--------------------------------------------|-----------------|----------------------------------------------------------|
|                      | <i>Tsc1<sup>fl/+</sup>;<br/>Tyrp1-Cre</i> | <i>Tsc1<sup>fl/fl</sup>;<br/>Tyrp1-Cre</i> | <i>Psmb-tko</i> | <i>Psmb-tko;<br/>Tsc1<sup>fl/fl</sup>;<br/>Tyrp1-Cre</i> |
| Microphthalmia (%)   | 0<br>(0/8)                                | 100<br>(10/10)                             | 0<br>(0/8)      | 62.5<br>(5/8)                                            |
| Retinal rosette (%)  | 0<br>(0/6)                                | 100<br>(6/6)                               | 0<br>(0/6)      | 62.5<br>(5/8)                                            |
