# Supplementary material for: mTORC1-induced retinal progenitor cell overproliferation leads to accelerated mitotic aging and degeneration of descendent Müller glia
Source: eLife journal article supplement (doi:10.7554/elife.70079), 2021-10-22

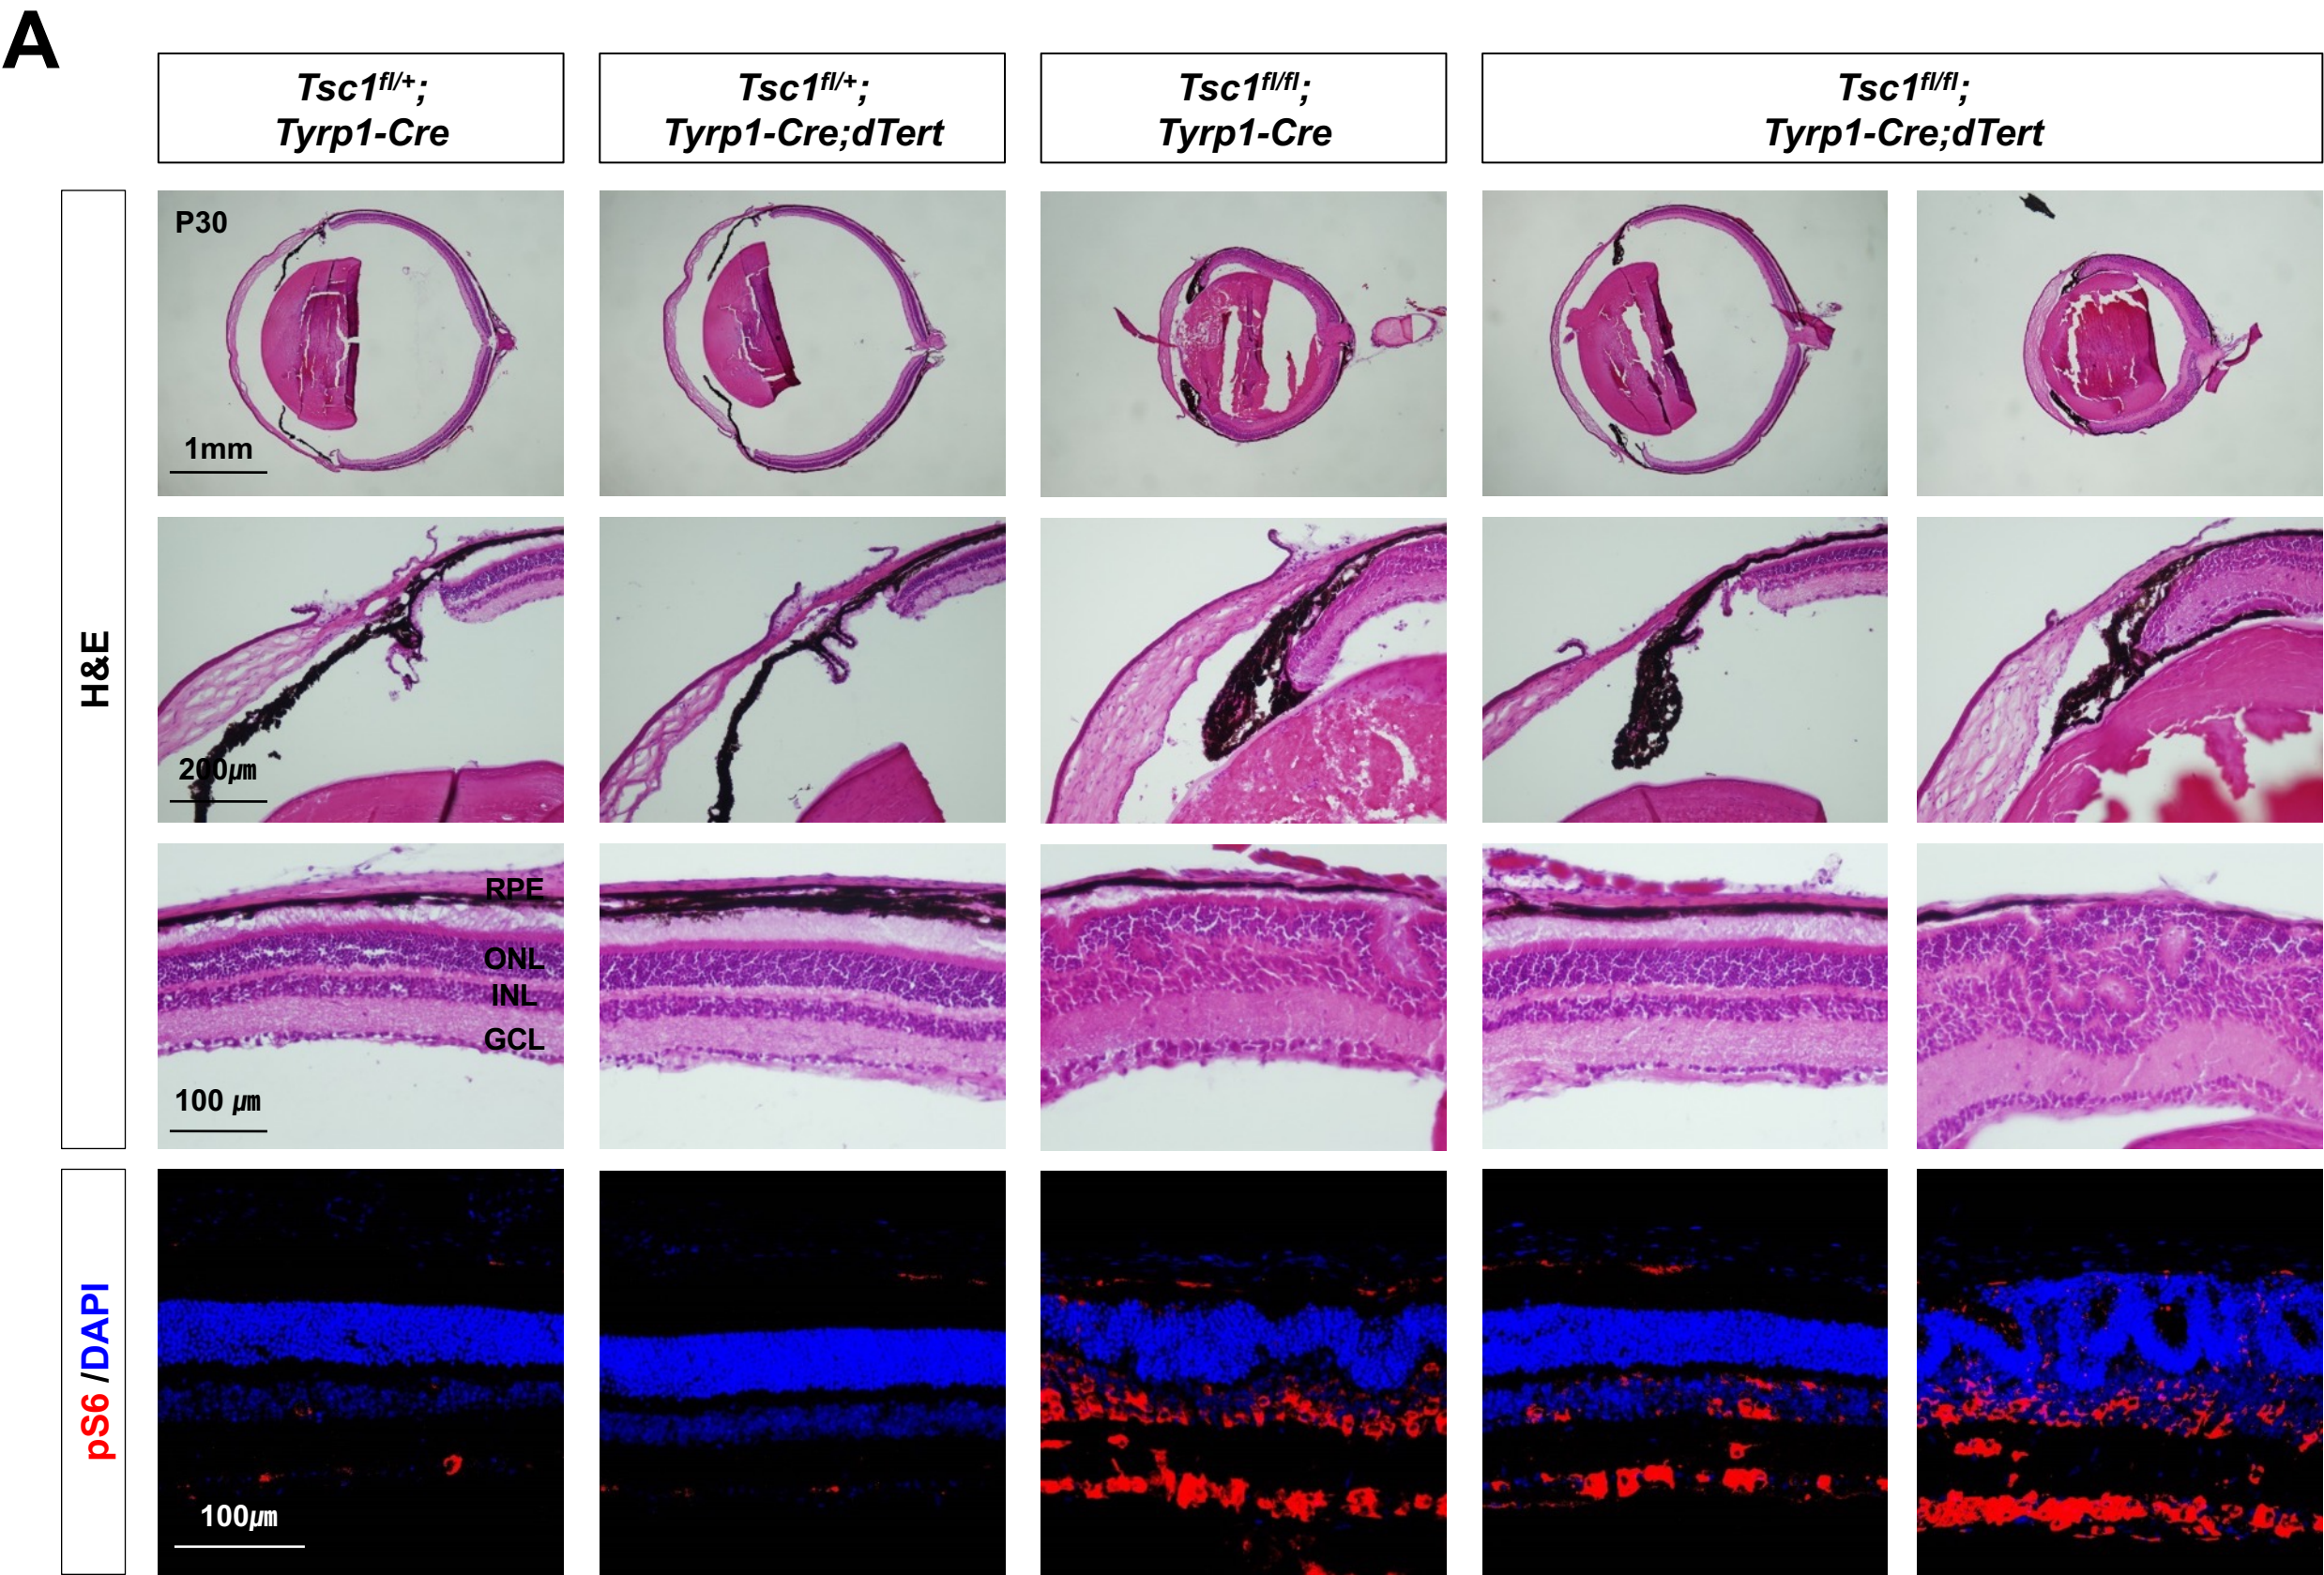

**B**

| Genotype \ Phenotype                              | Microphthalmia (%) | Retinal rosette (%) |
|---------------------------------------------------|--------------------|---------------------|
| <i>Tsc1<sup>fl/+</sup>;<br/>Tyrrp1-Cre</i>        | 0 (0/12)           | 0 (0/6)             |
| <i>Tsc1<sup>fl/+</sup>;<br/>Tyrrp1-Cre;dTert</i>  | 0 (0/10)           | 0 (0/10)            |
| <i>Tsc1<sup>fl/fl</sup>;<br/>Tyrrp1-Cre</i>       | 100 (8/8)          | 100 (6/6)           |
| <i>Tsc1<sup>fl/fl</sup>;<br/>Tyrrp1-Cre;dTert</i> | 80 (8/10)          | 80 (8/10)           |

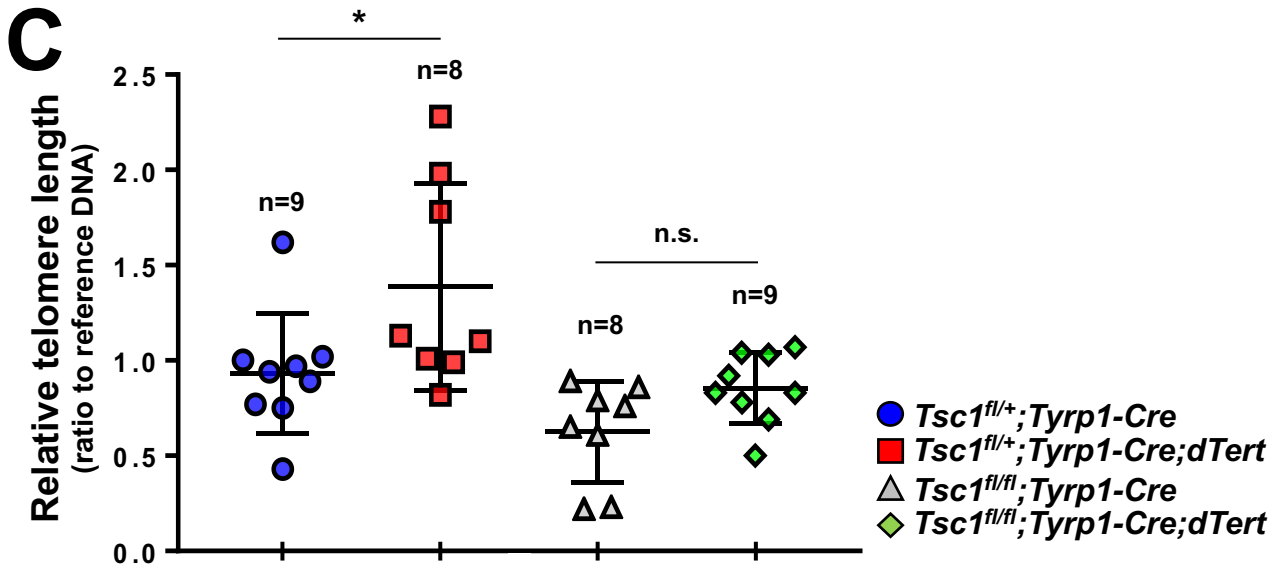

Supplement: supp [file elife-70079-supp-v1.zip]
