# Supplementary material for: mTORC1-induced retinal progenitor cell overproliferation leads to accelerated mitotic aging and degeneration of descendent Müller glia
Source: eLife journal article supplement (doi:10.7554/elife.70079), 2021-10-22

Fig.5C

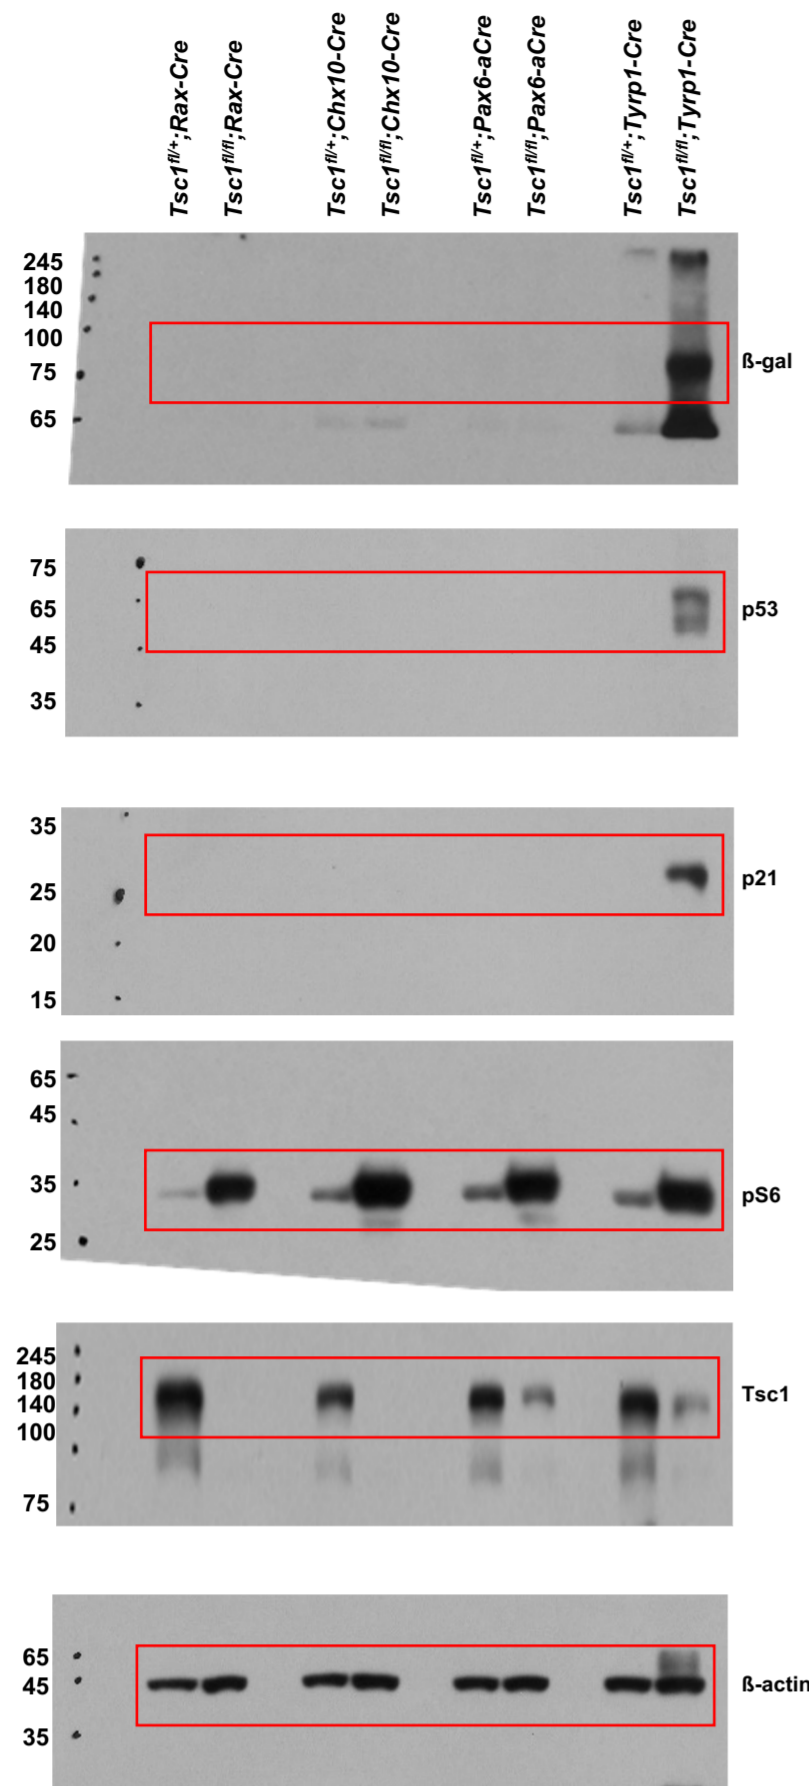

Fig.5I

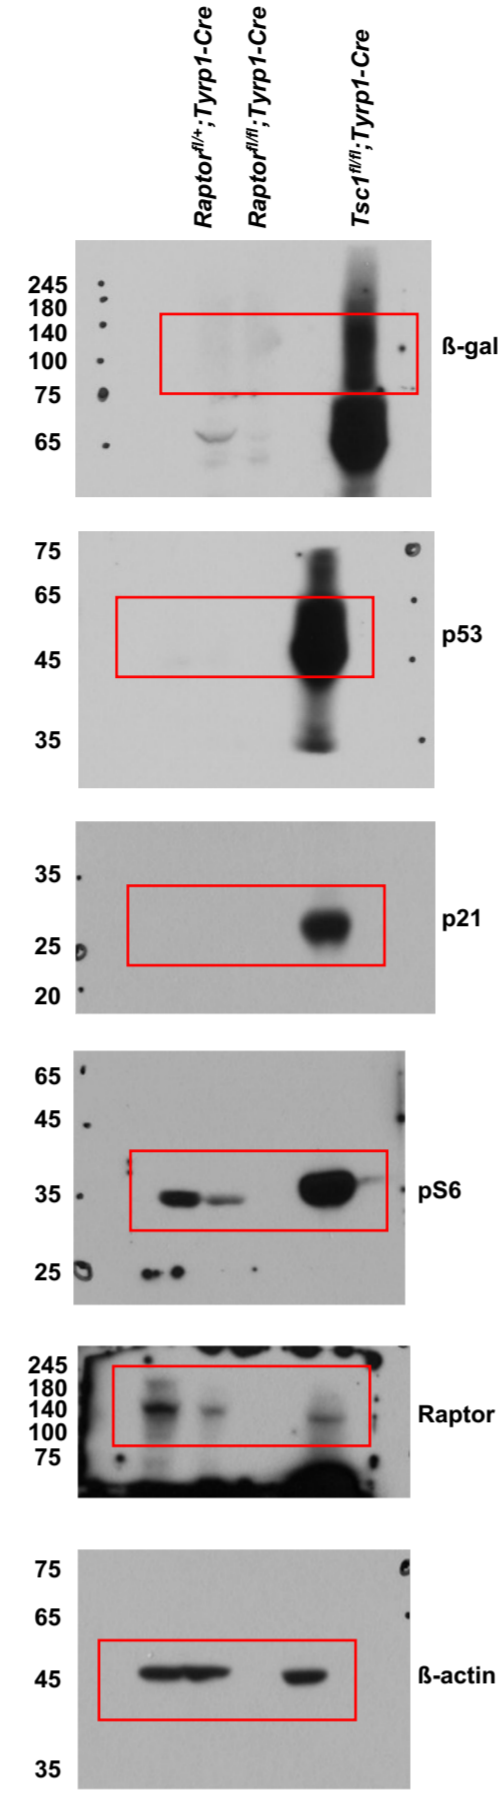

Fig.6A

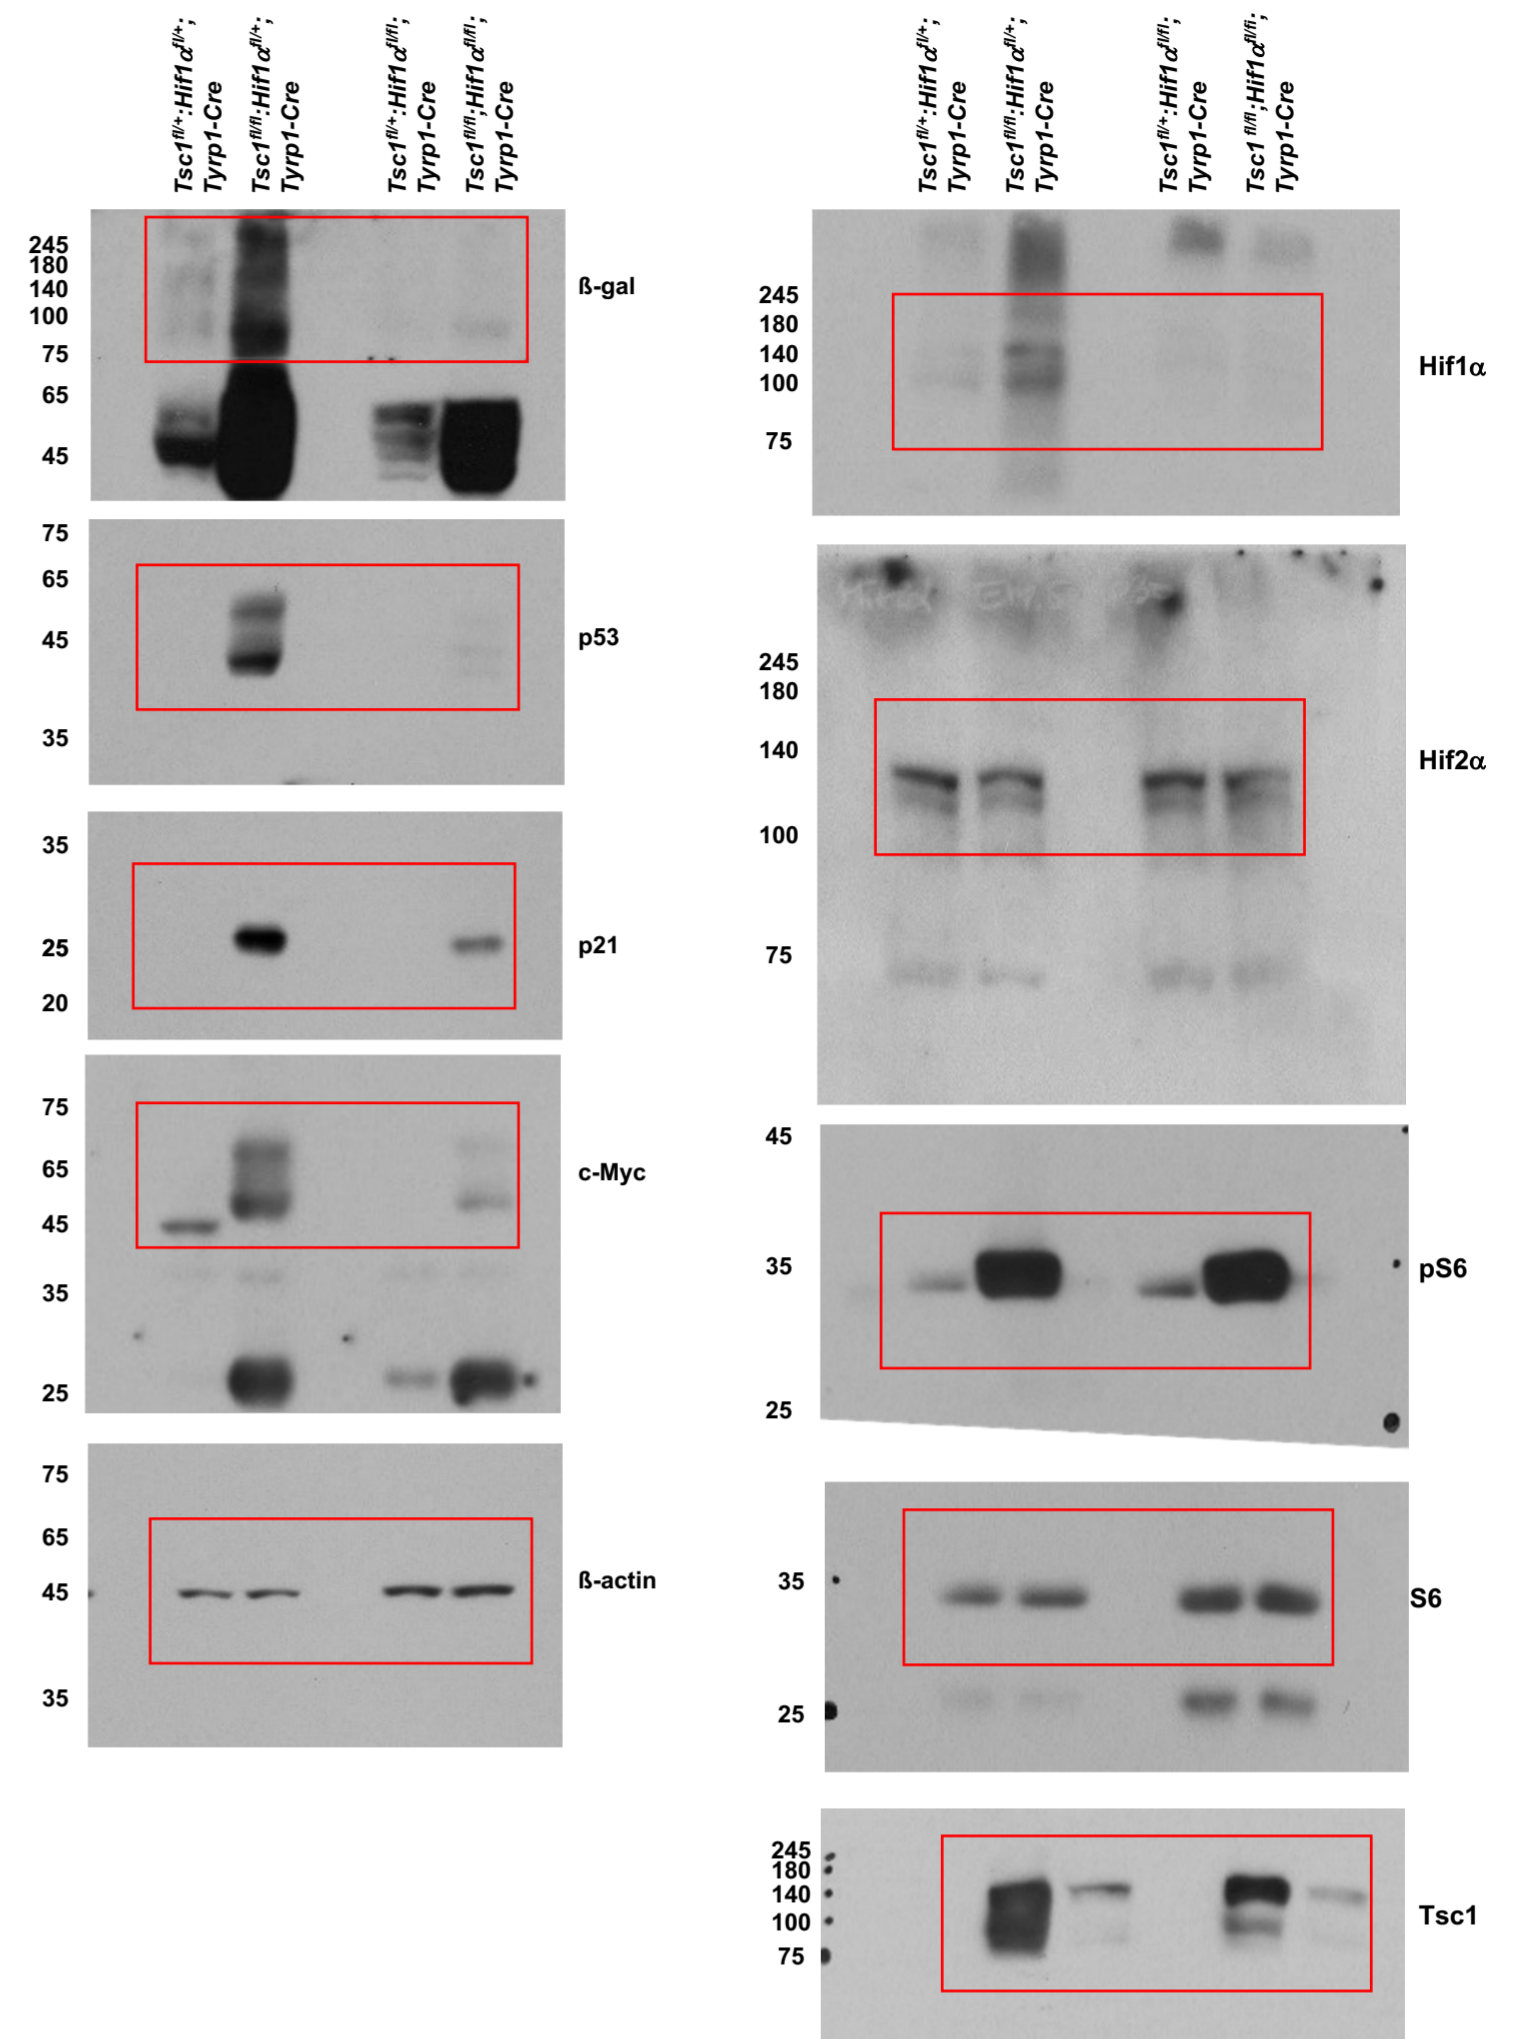

Fig.7E

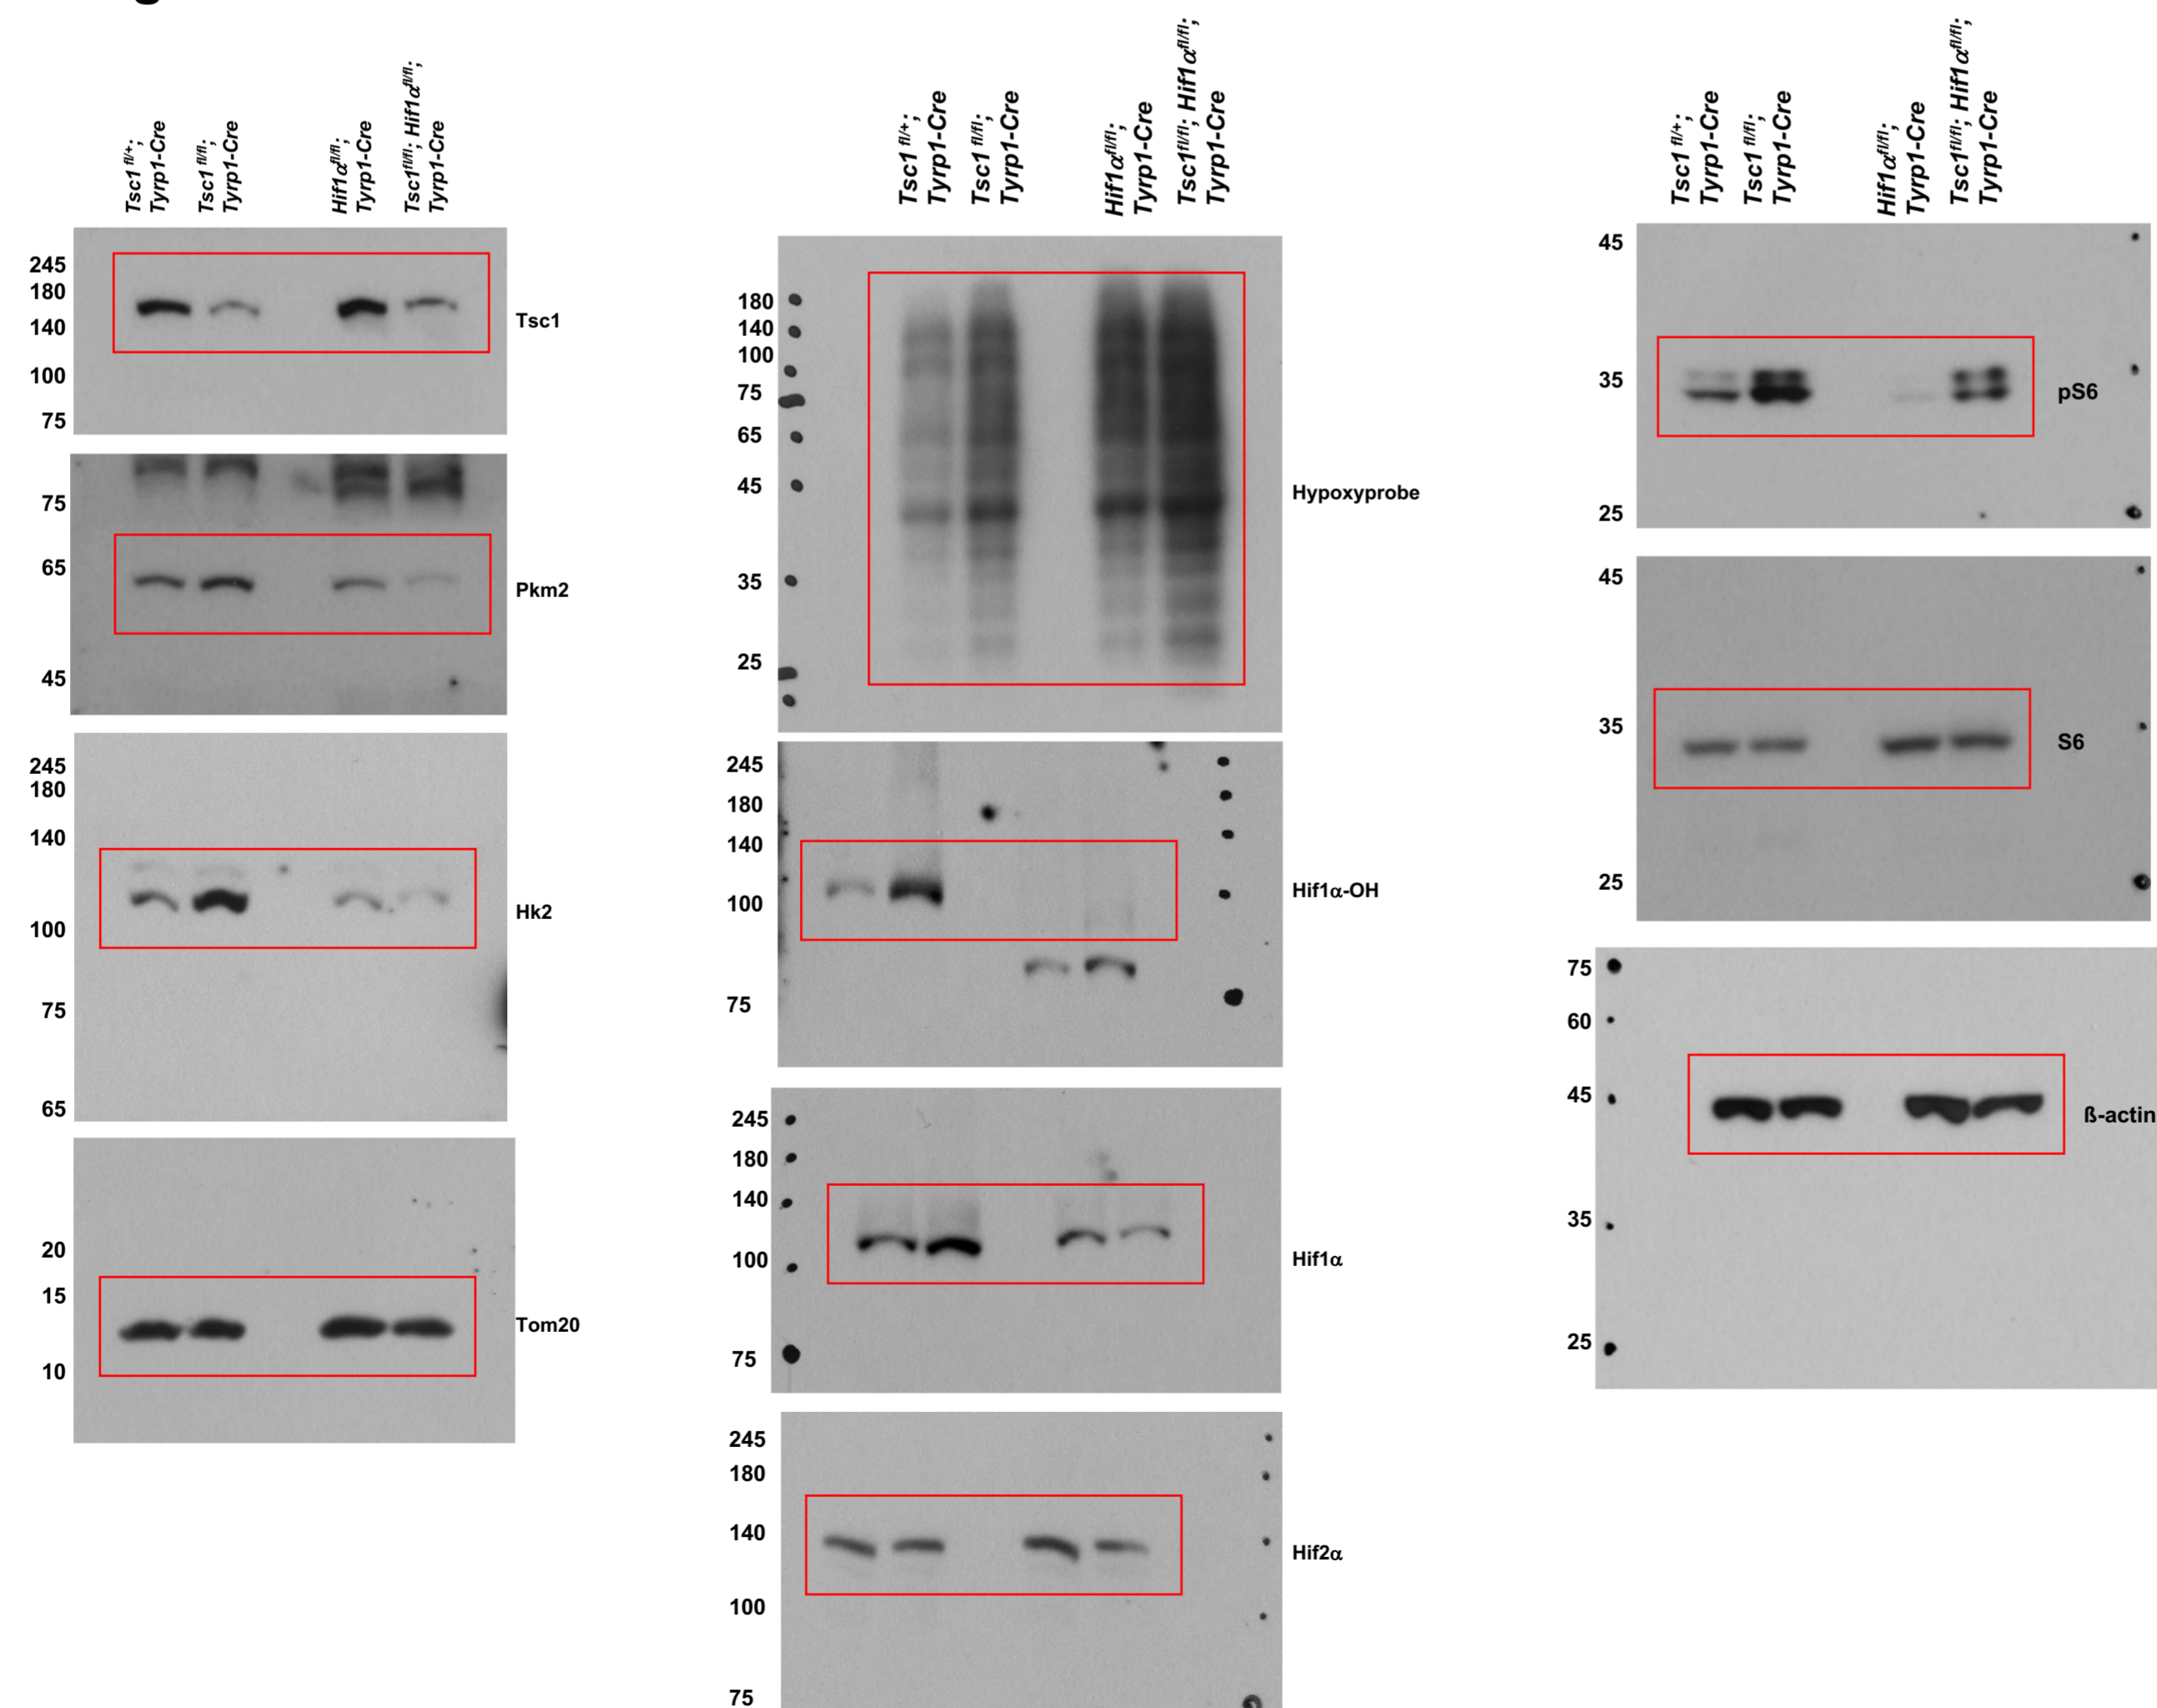

Supplement: supp [file elife-70079-supp-v1.zip]
