# Supplementary figures and images for: mTORC1-induced retinal progenitor cell overproliferation leads to accelerated mitotic aging and degeneration of descendent Müller glia
Source: eLife journal article supplement (doi:10.7554/elife.70079), 2021-10-22

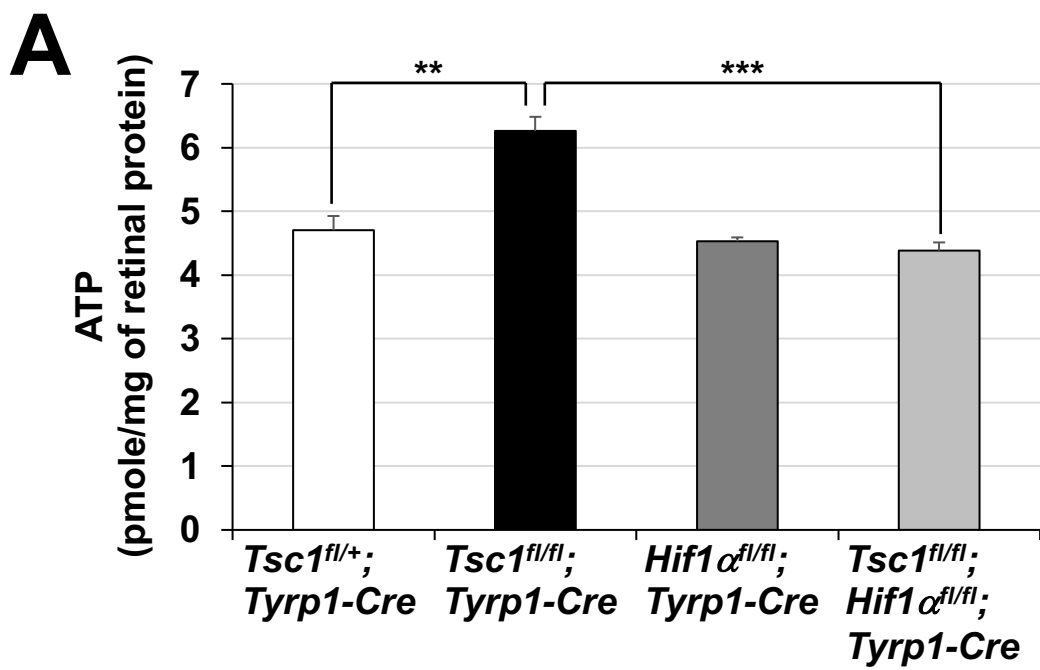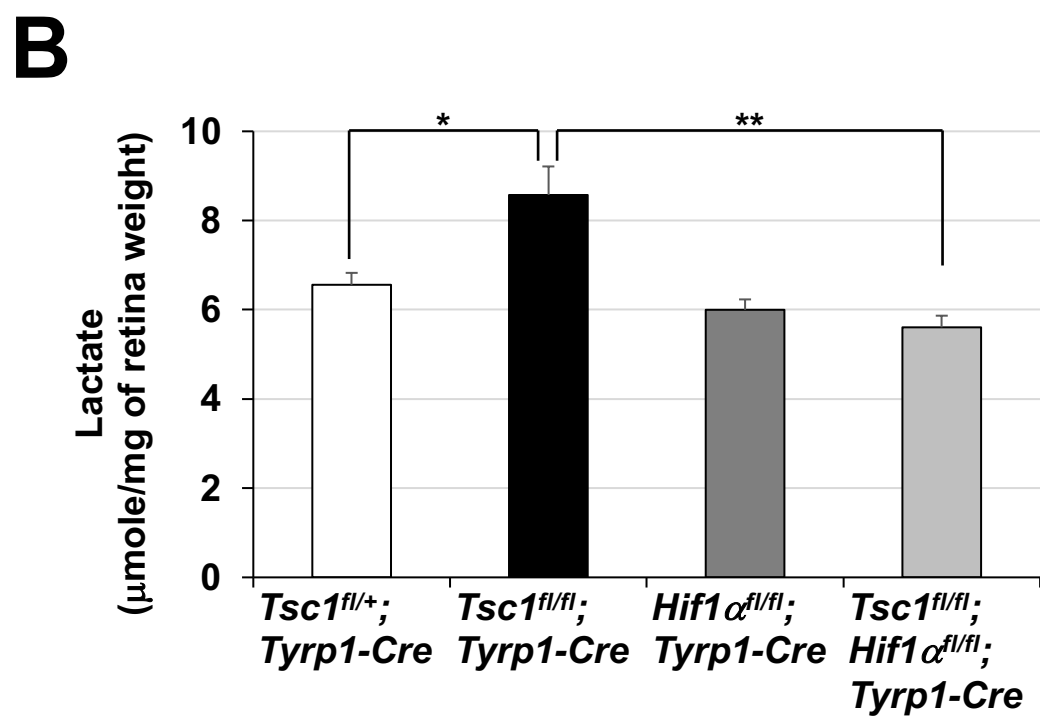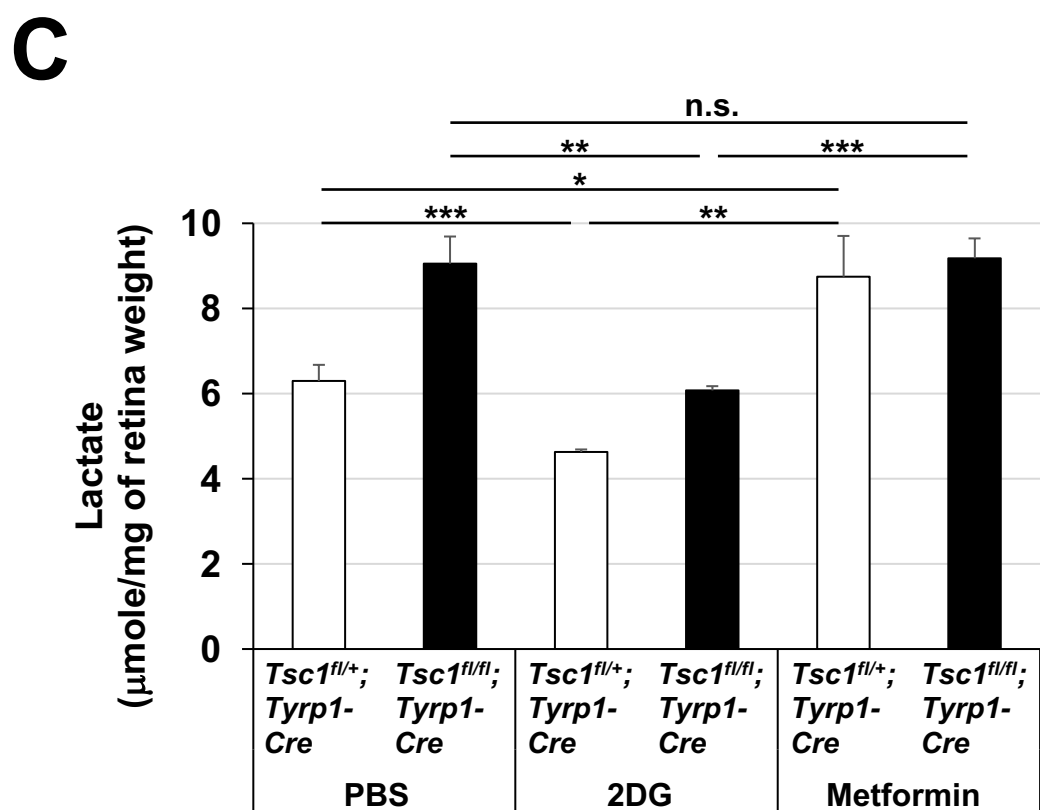

Supplement: supp [file elife-70079-supp-v1.zip]

**A**

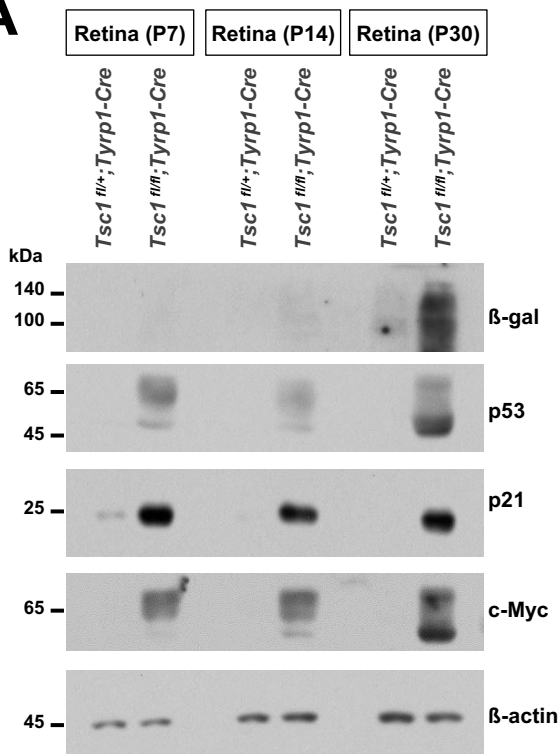

**B**

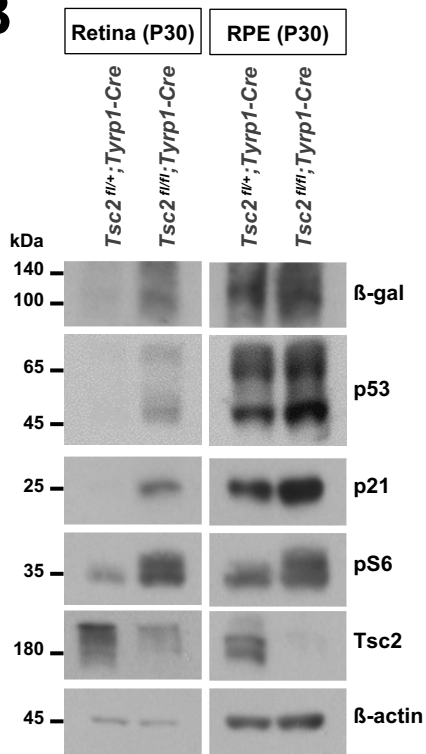

Supplement: supp [file elife-70079-supp-v1.zip]

A

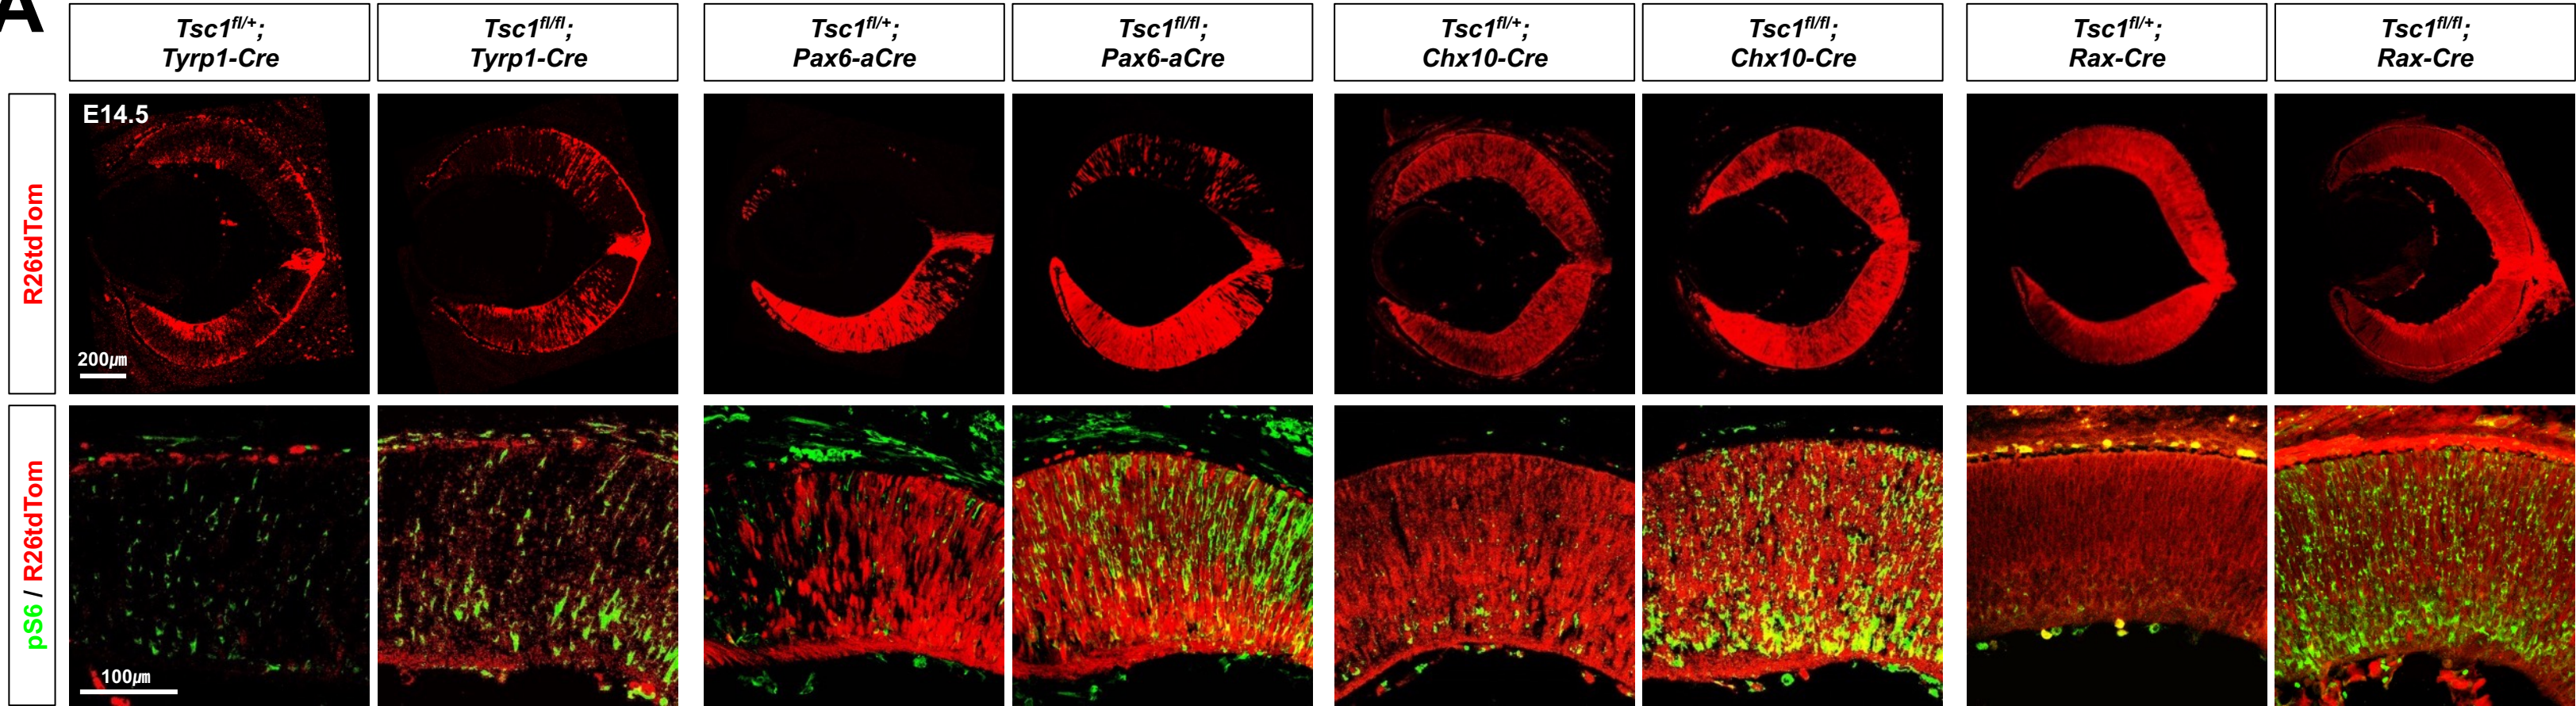

B

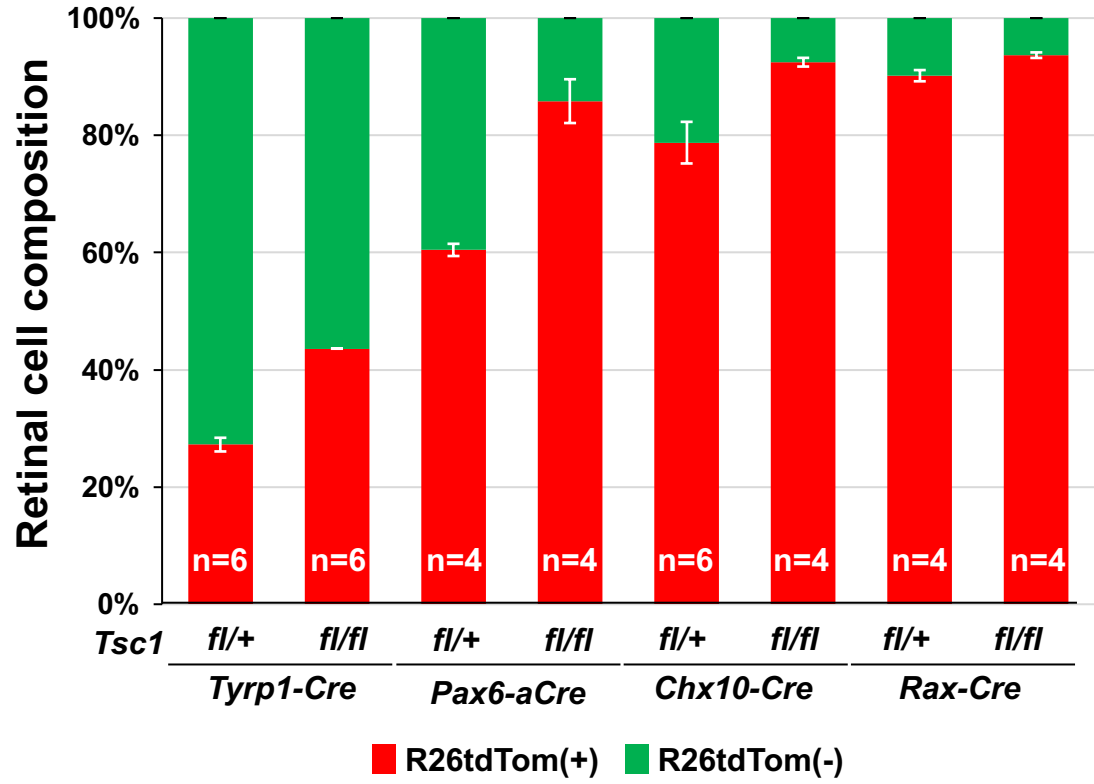

Supplement: supp [file elife-70079-supp-v1.zip]

Developmental stage

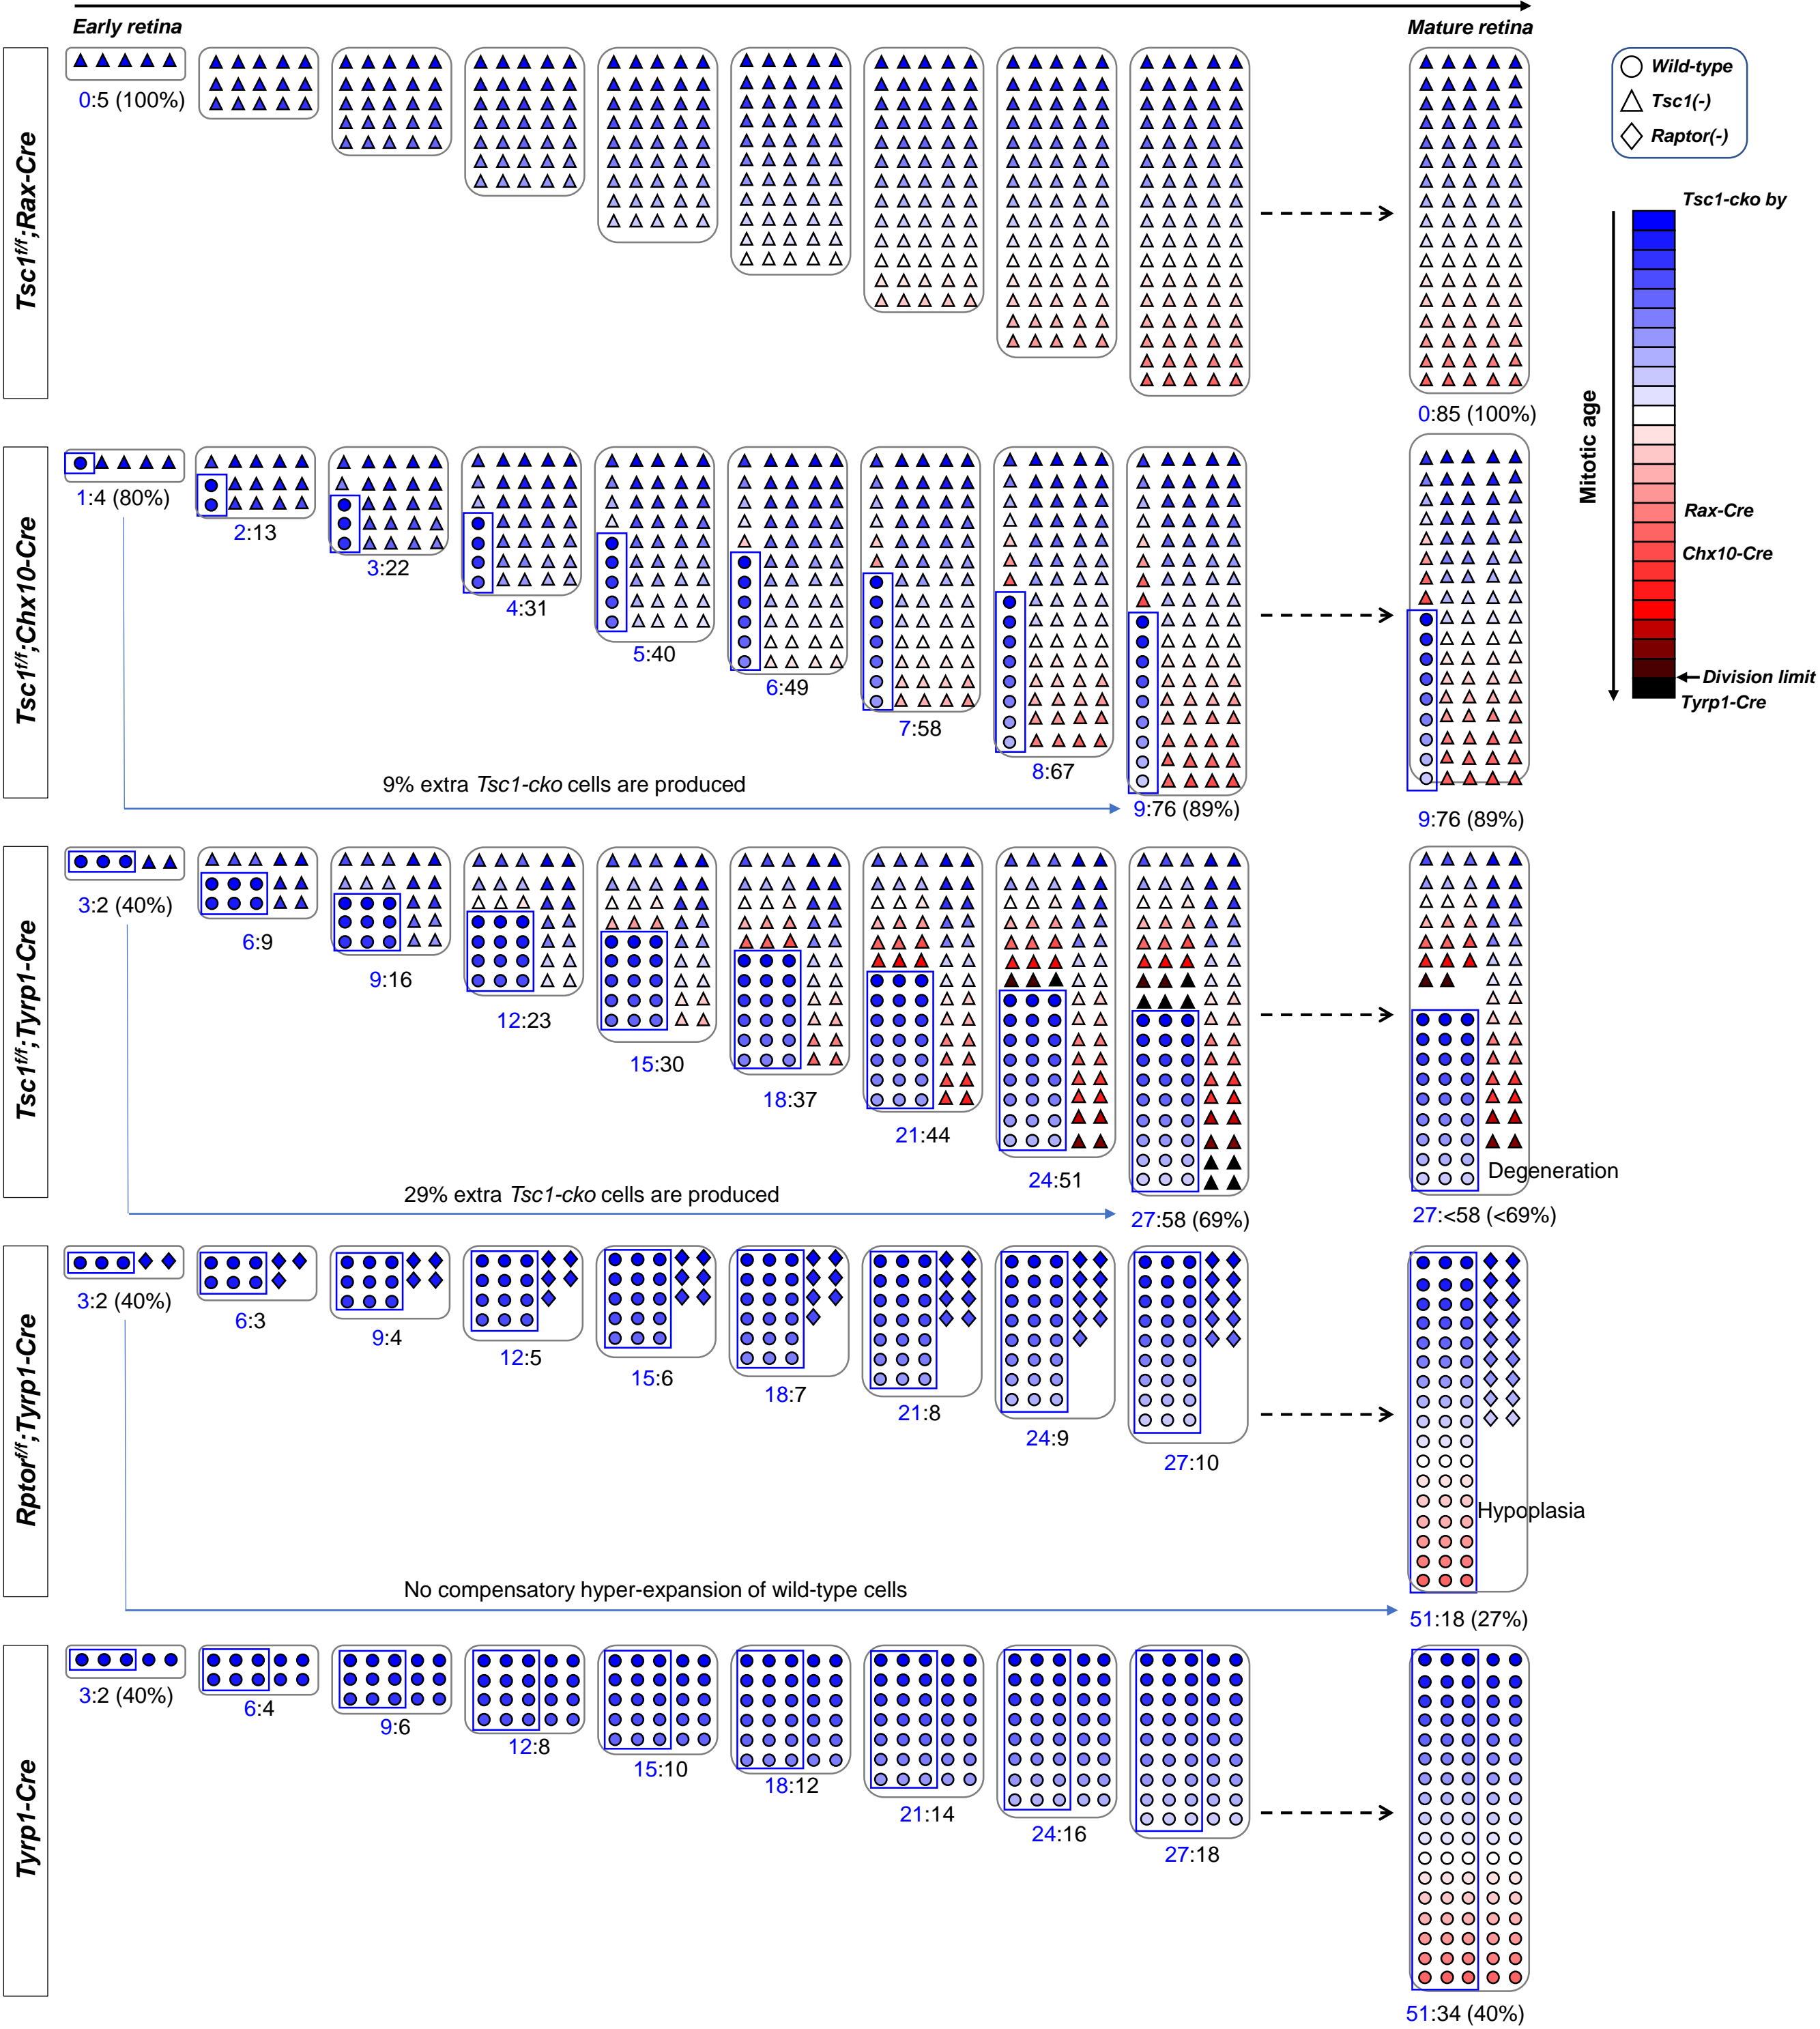

Supplement: supp [file elife-70079-supp-v1.zip]

**A**

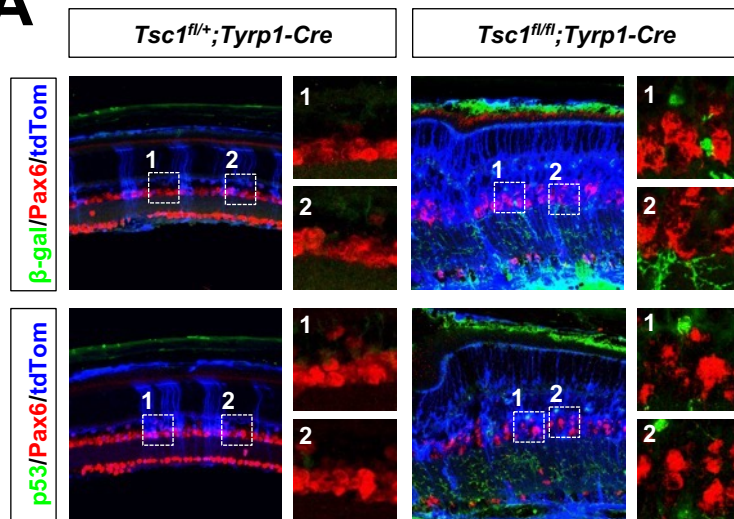

**B**

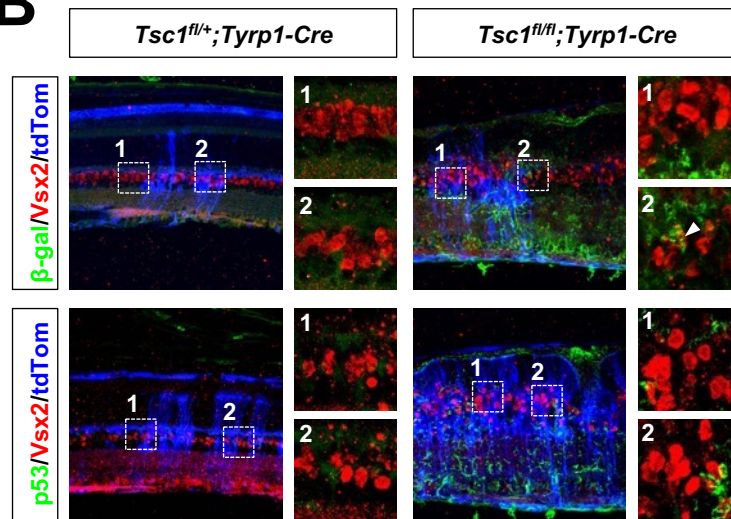

Supplement: supp [file elife-70079-supp-v1.zip]

**A**

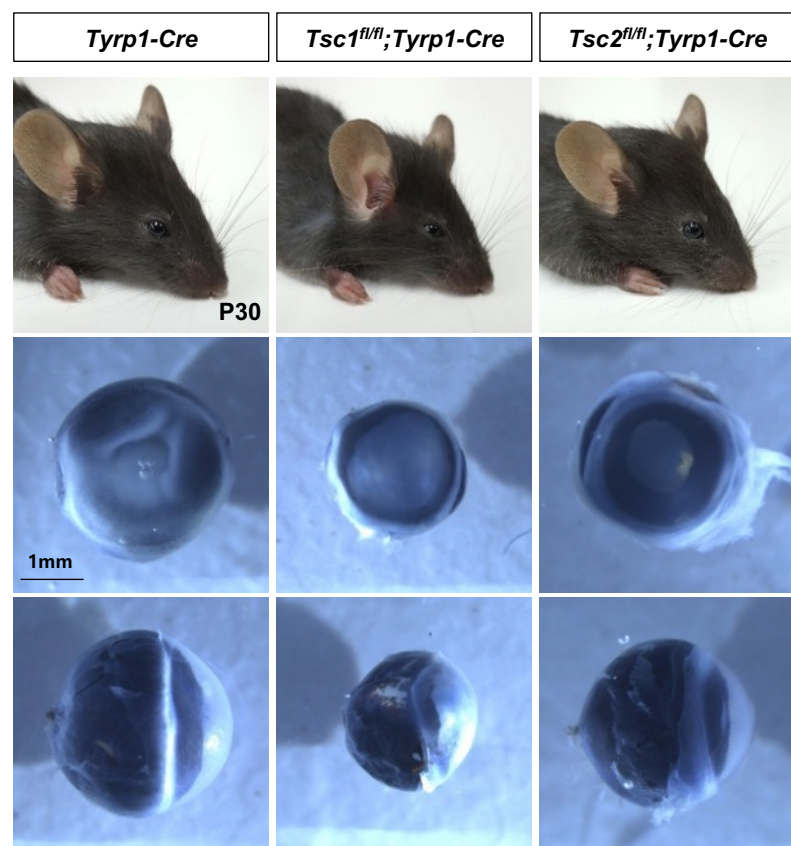

**B**

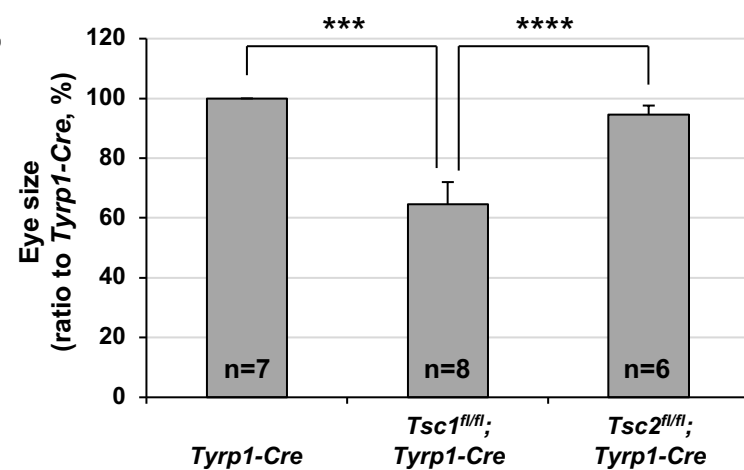

**C**

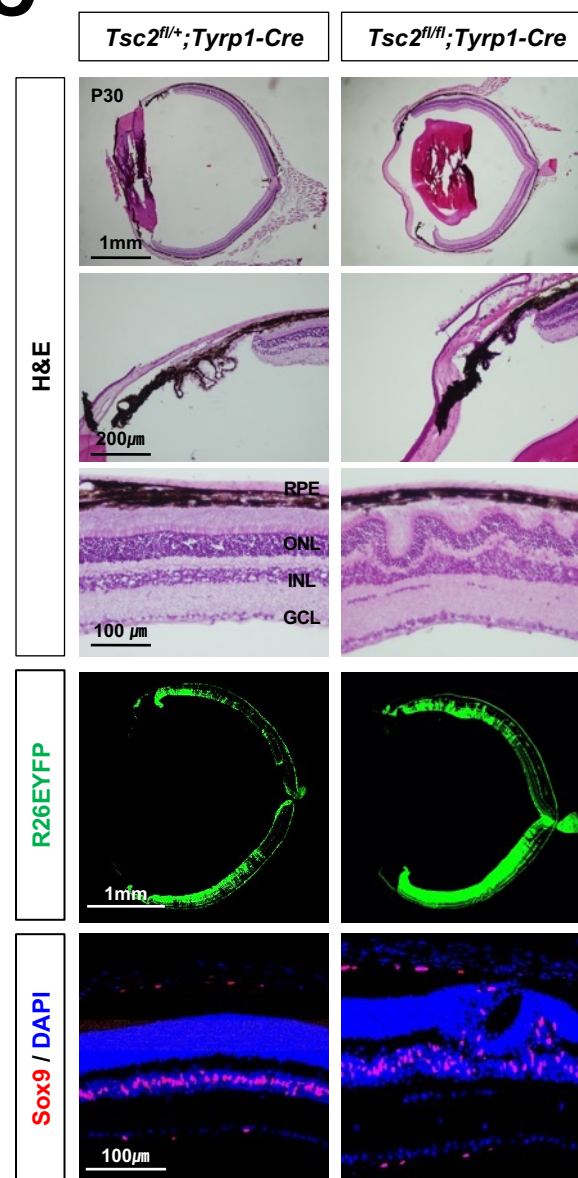

**D**

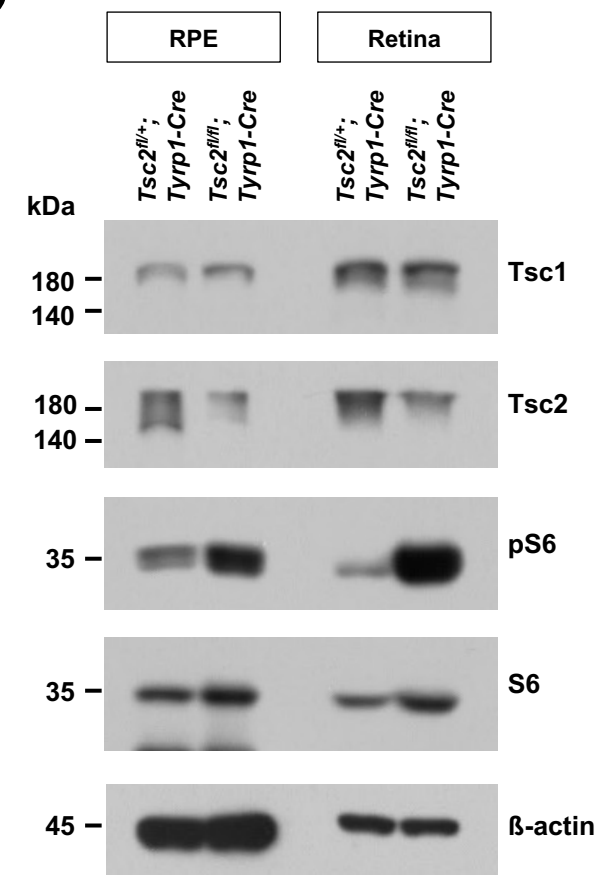

Supplement: supp [file elife-70079-supp-v1.zip]

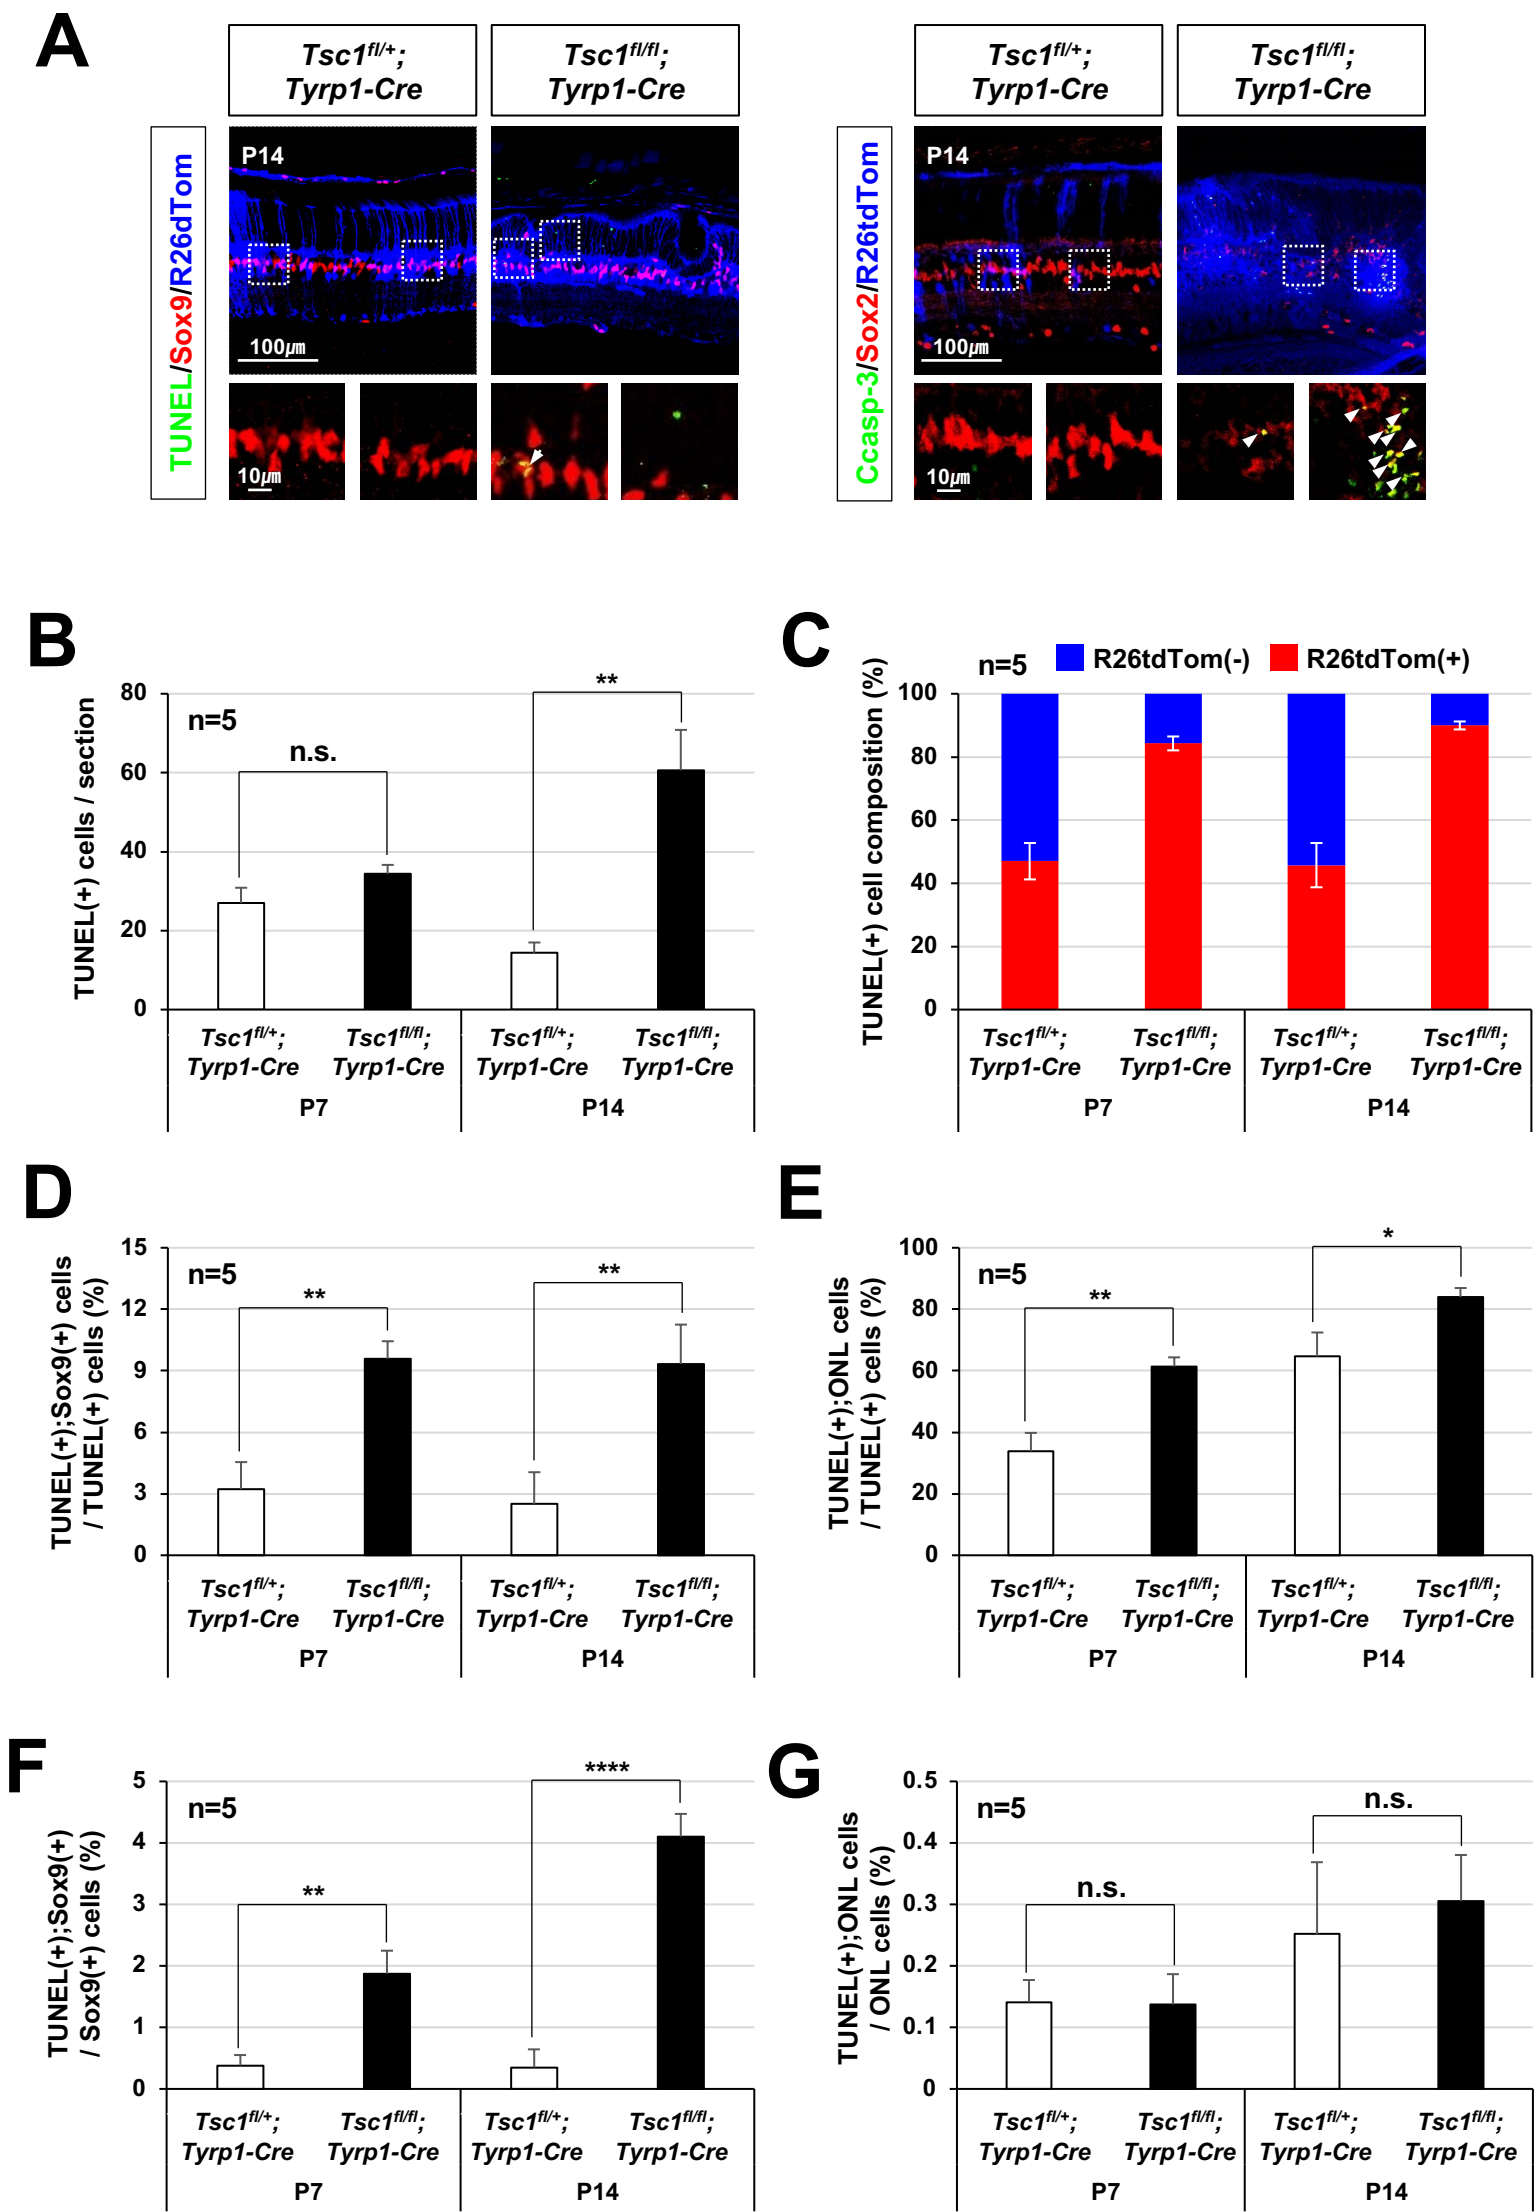

Supplement: supp [file elife-70079-supp-v1.zip]

A

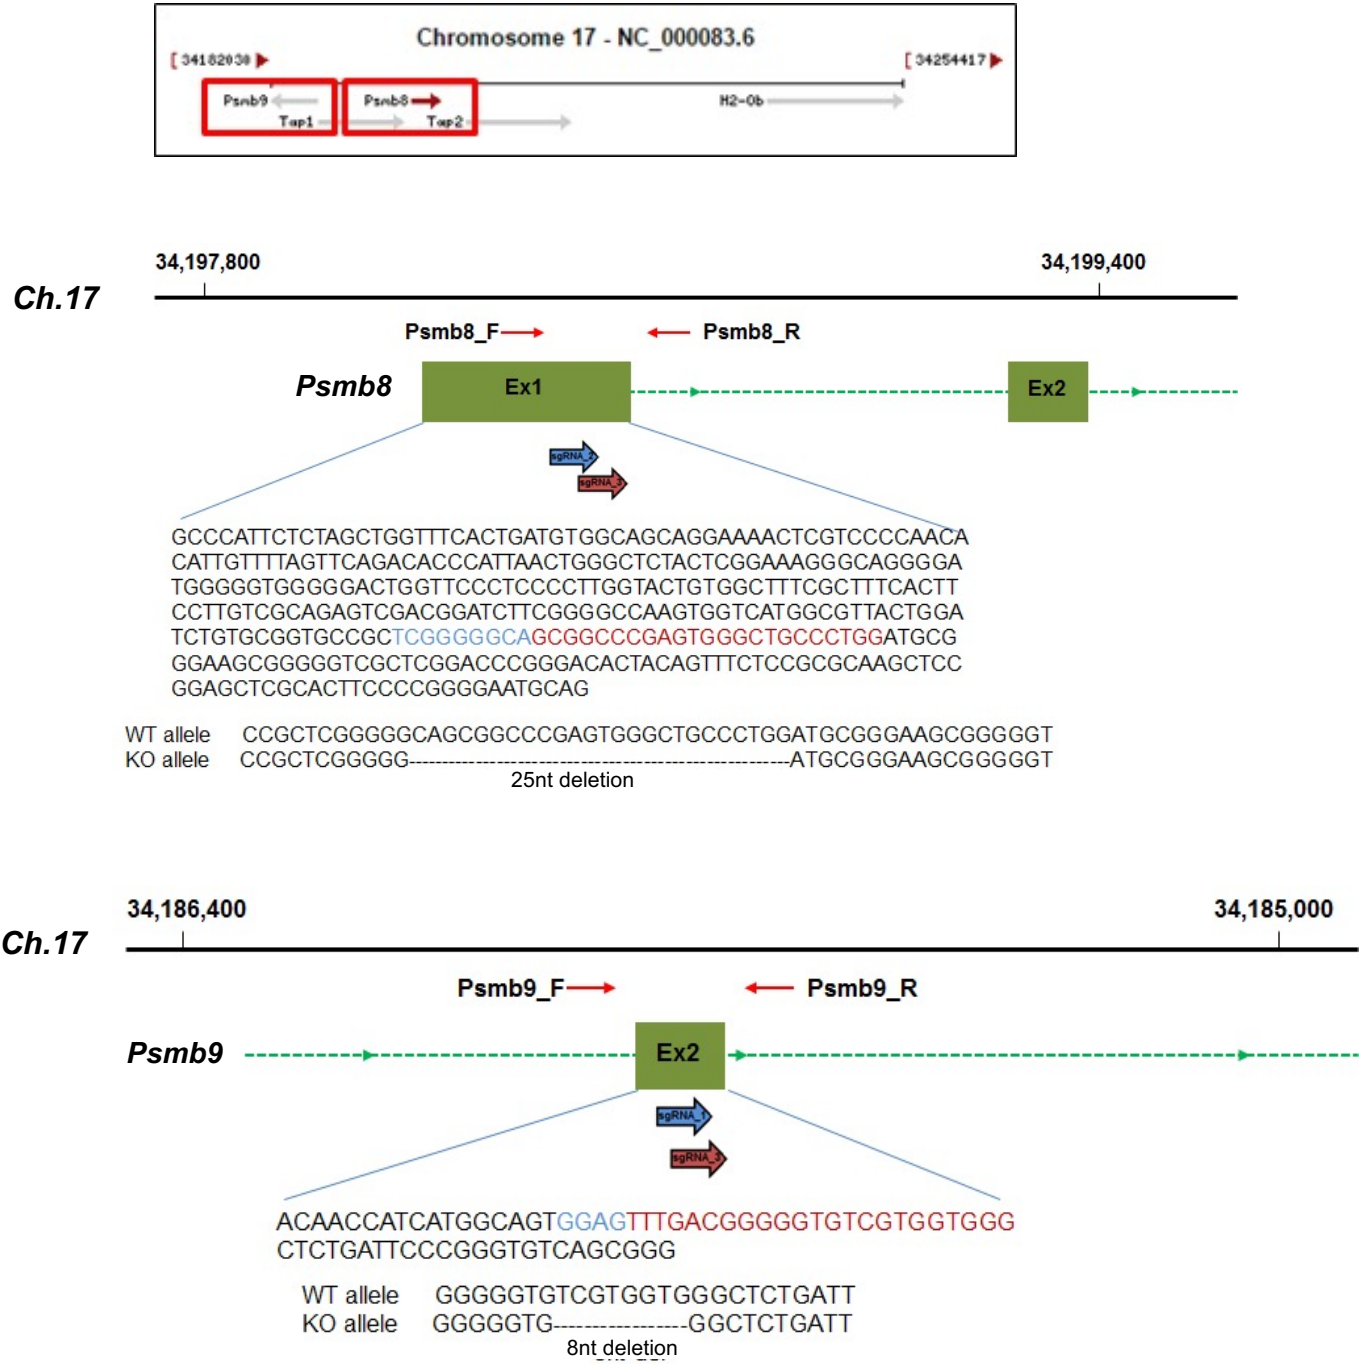

B

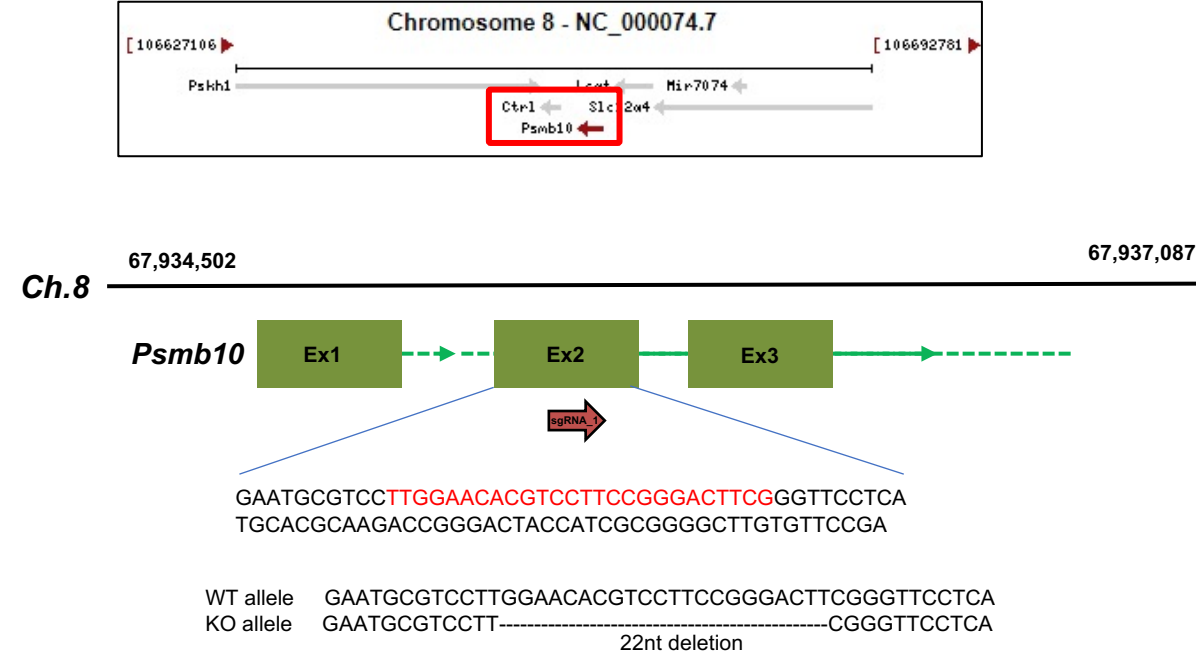

Supplement: supp [file elife-70079-supp-v1.zip]

A

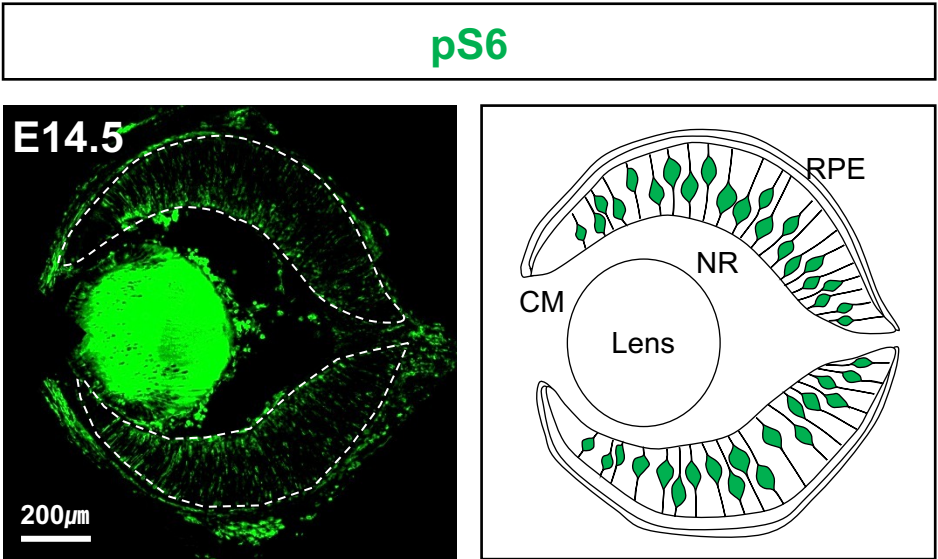

B

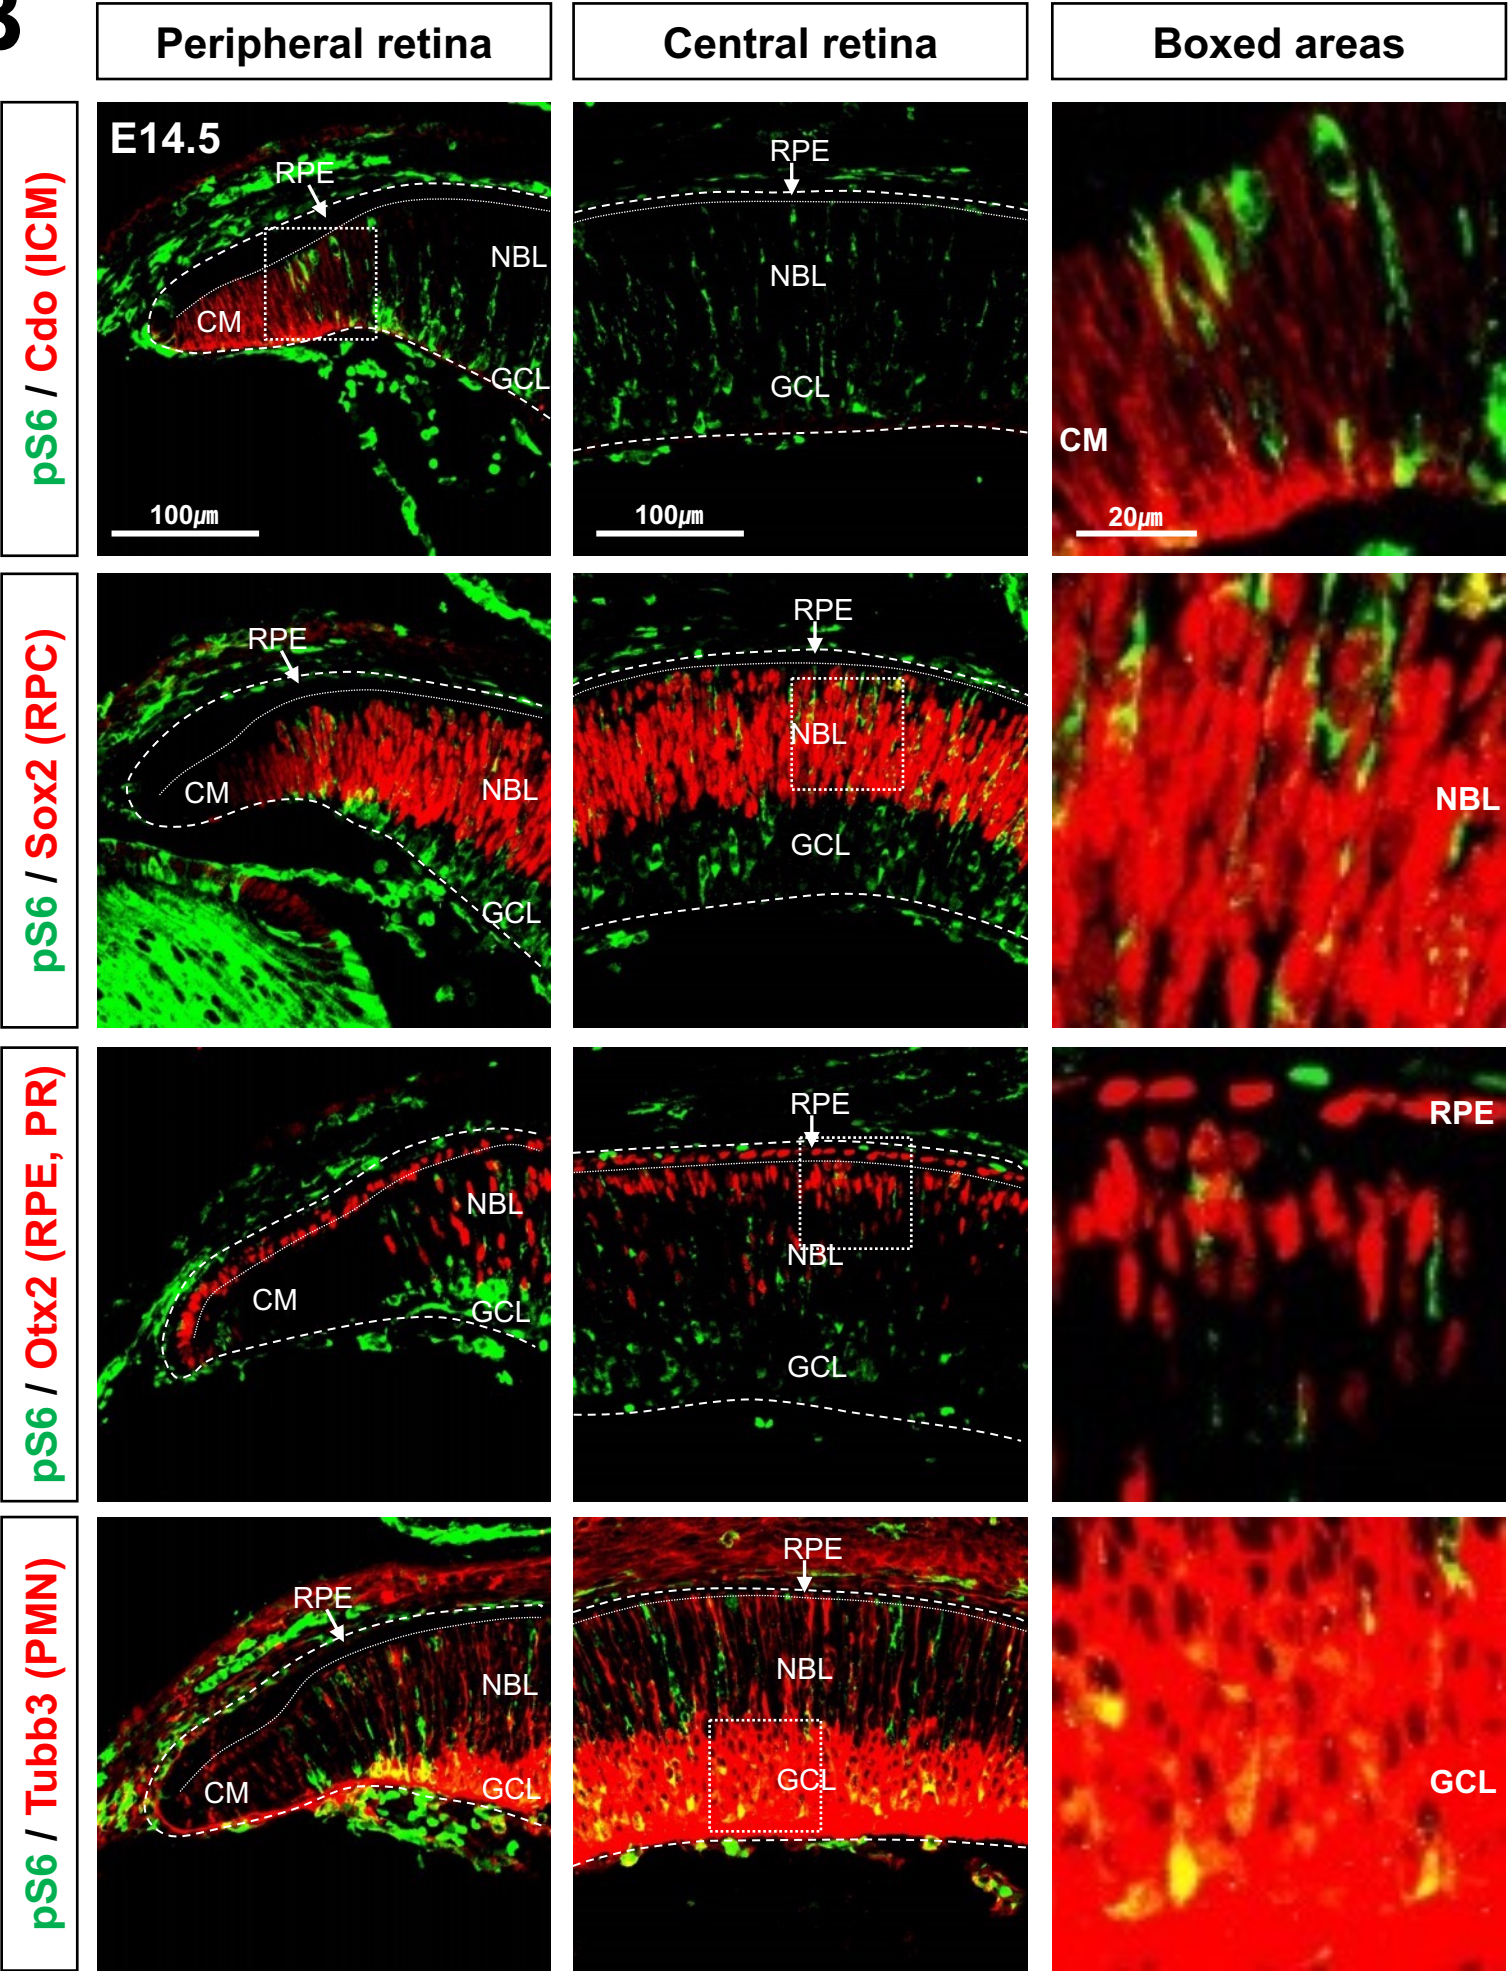

Supplement: supp [file elife-70079-supp-v1.zip]

A

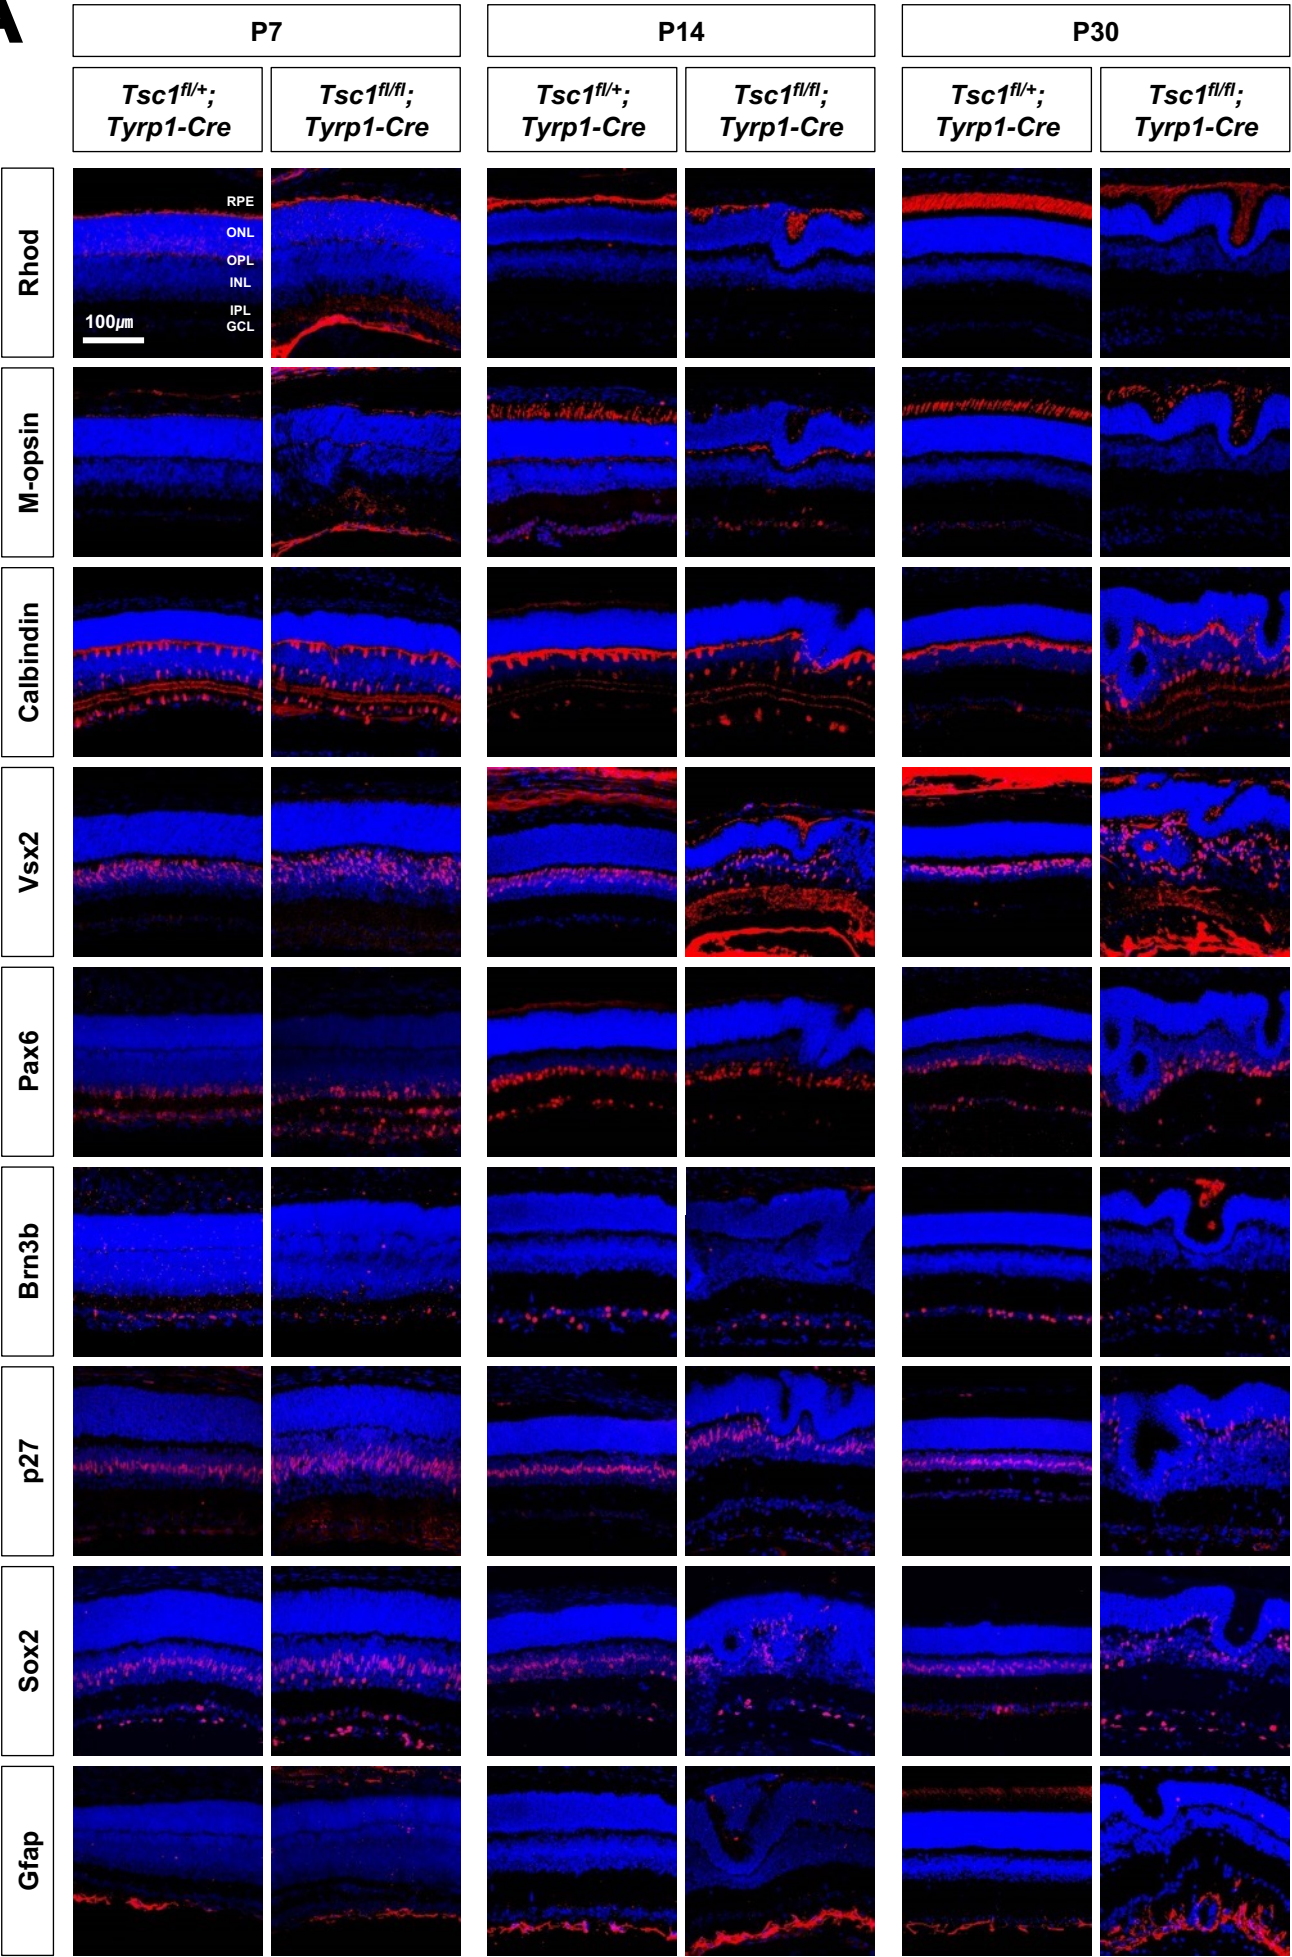

B

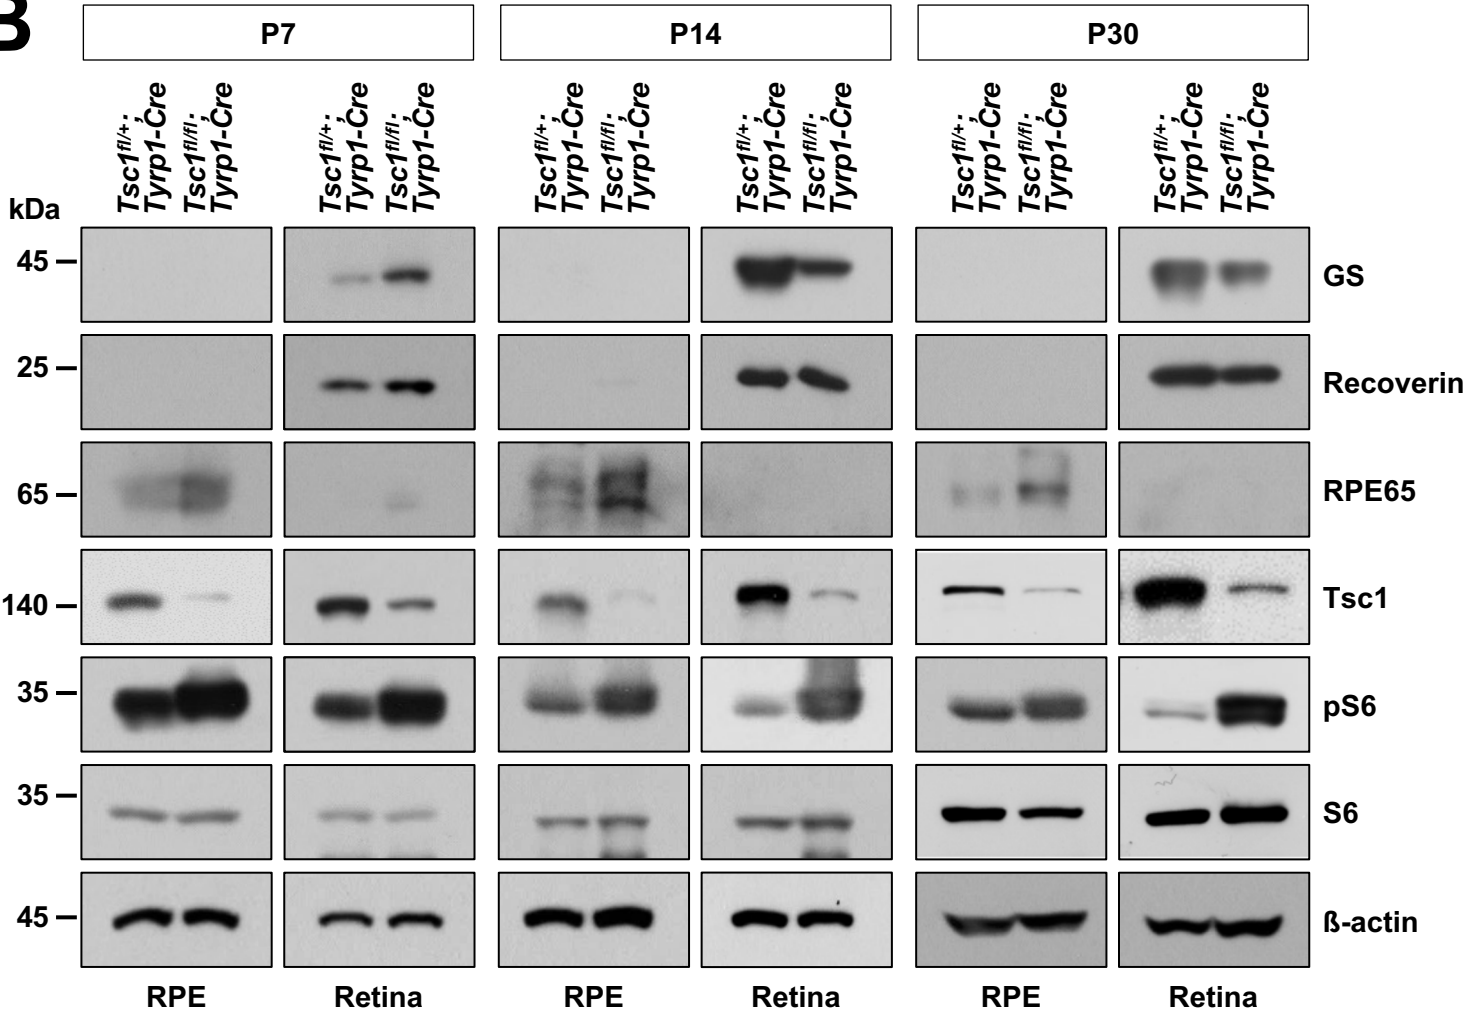

Supplement: supp [file elife-70079-supp-v1.zip]

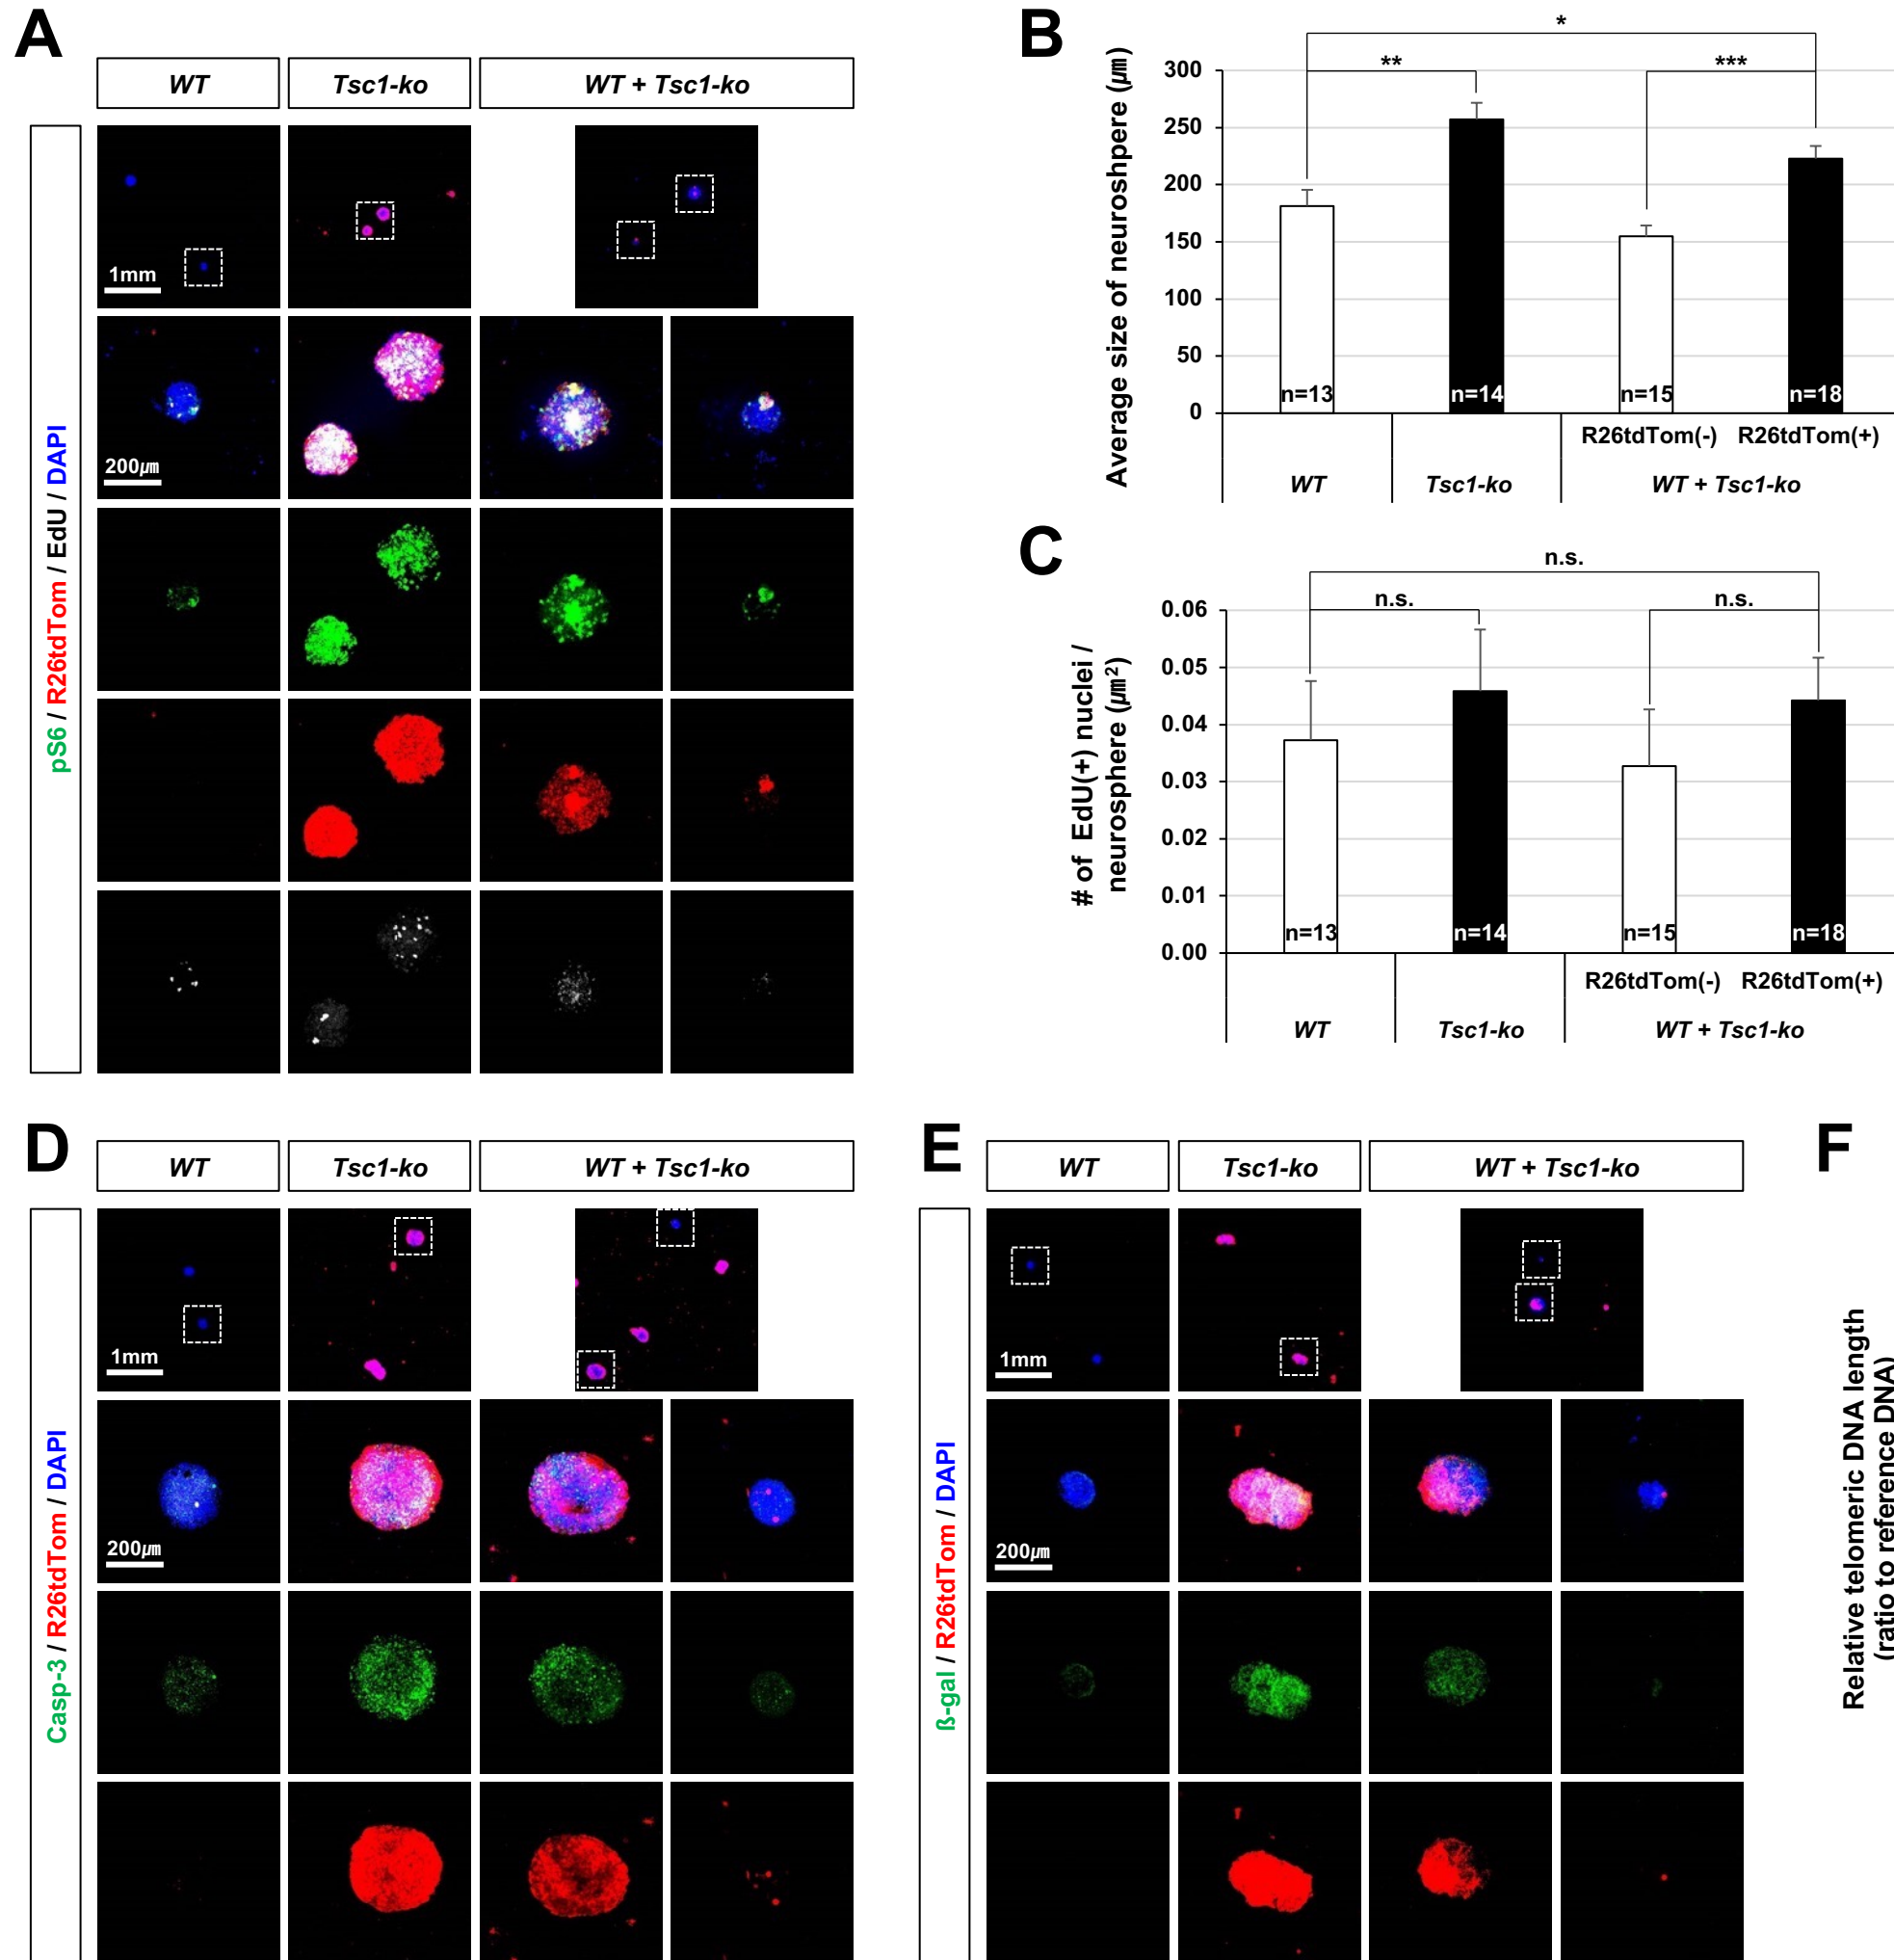

Supplement: supp [file elife-70079-supp-v1.zip]

**A**

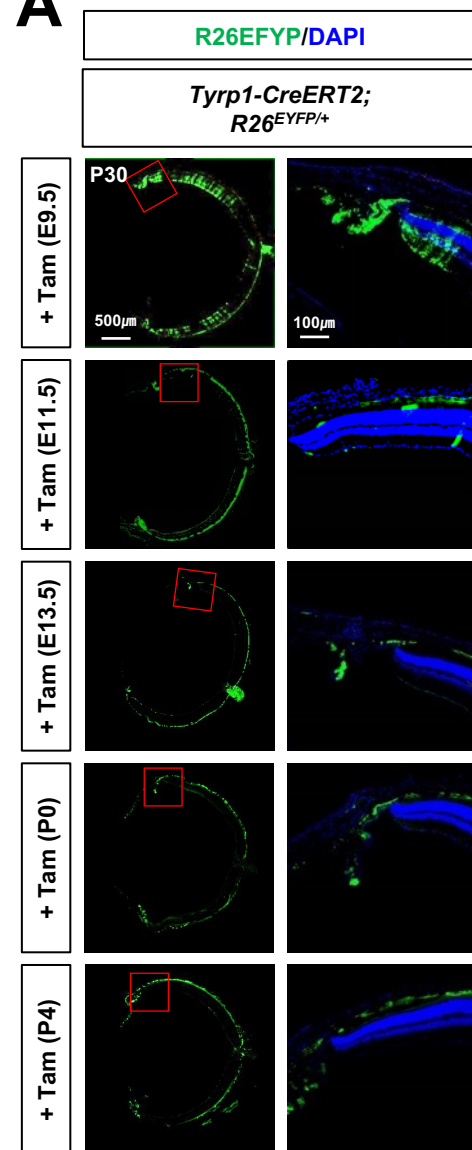

**B**

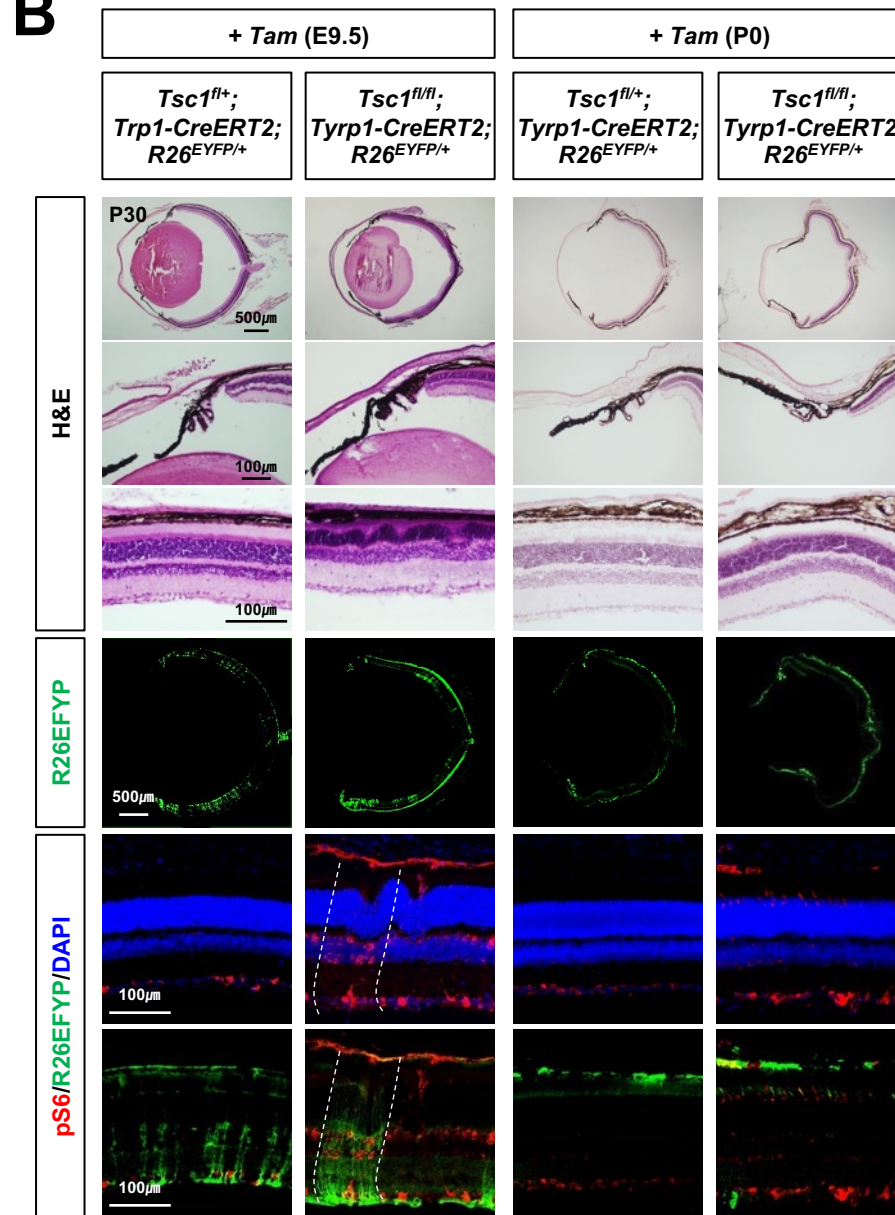

**C**

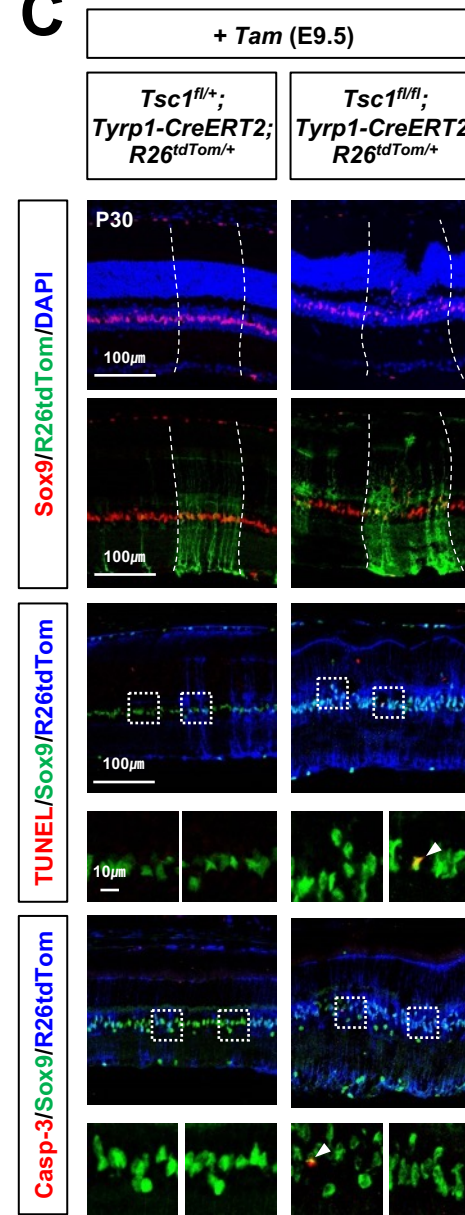

**D**

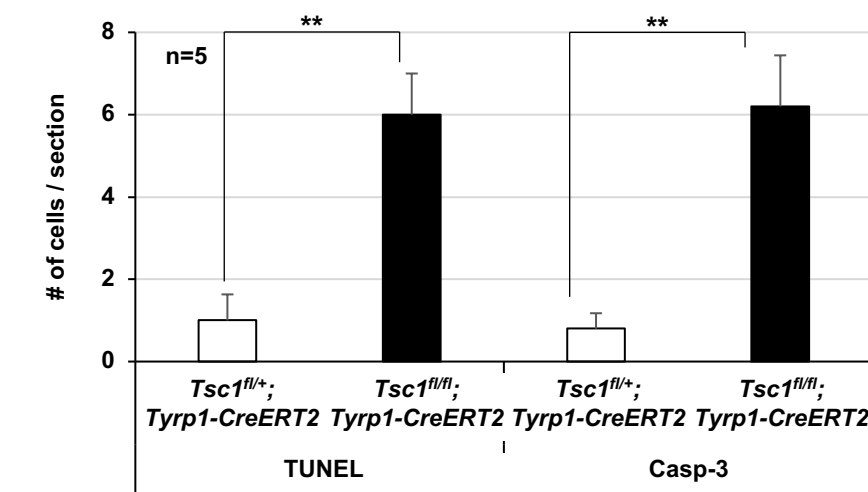

**E**

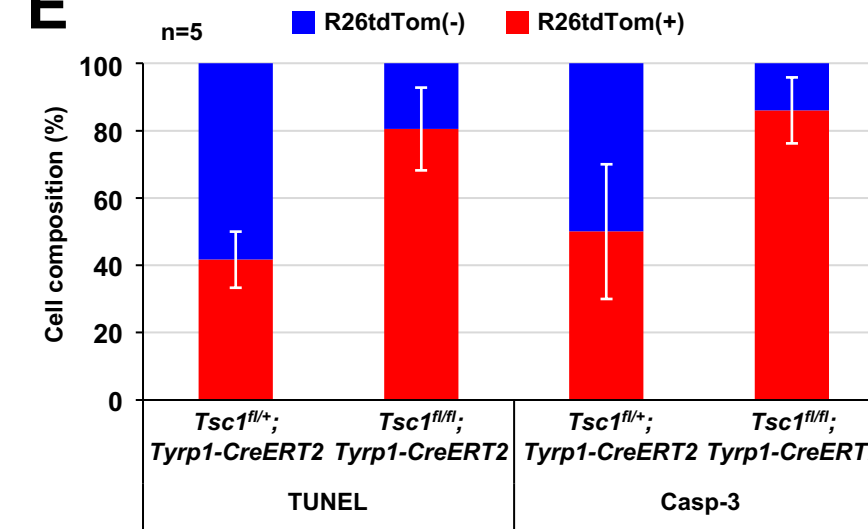

Supplement: supp [file elife-70079-supp-v1.zip]

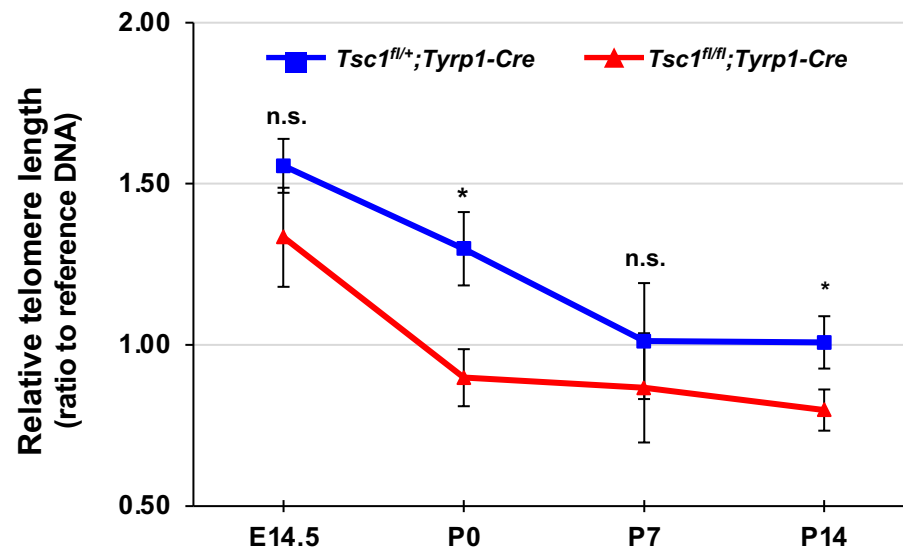

Supplement: supp [file elife-70079-supp-v1.zip]
